# Supplementary material
Source: MDPI journal article supplement (https://www.mdpi.com/2076-3417/12/7/3385)
Supplement: s1 [file s1]

*Supplementary Materials*

# **A model for the assessment of the economic benefits associated with energy retrofit interventions: an application to existing buildings in the Italian territory**

**Francesco Tajani <sup>1,\*</sup>, Pierluigi Morano <sup>2</sup>, Felicia Di Liddo <sup>2</sup>, Endriol Doko <sup>1</sup>**

<sup>1</sup> Department of Architecture and Design, Sapienza University of Rome, Via Flaminia 359, 00196 Rome, Italy; francesco.tajani@uniroma1.it; endriol.doko@uniroma1.it

<sup>2</sup> Department of Civil, Environmental, Land, Building Engineering and Chemistry (DICATECh), Polytechnic University of Bari, Via Orabona 4, 70125 Bari, Italy; pierluigi.morano@poliba.it; felicia.diliddo@poliba.it

\* Correspondence: francesco.tajani@uniroma1.it

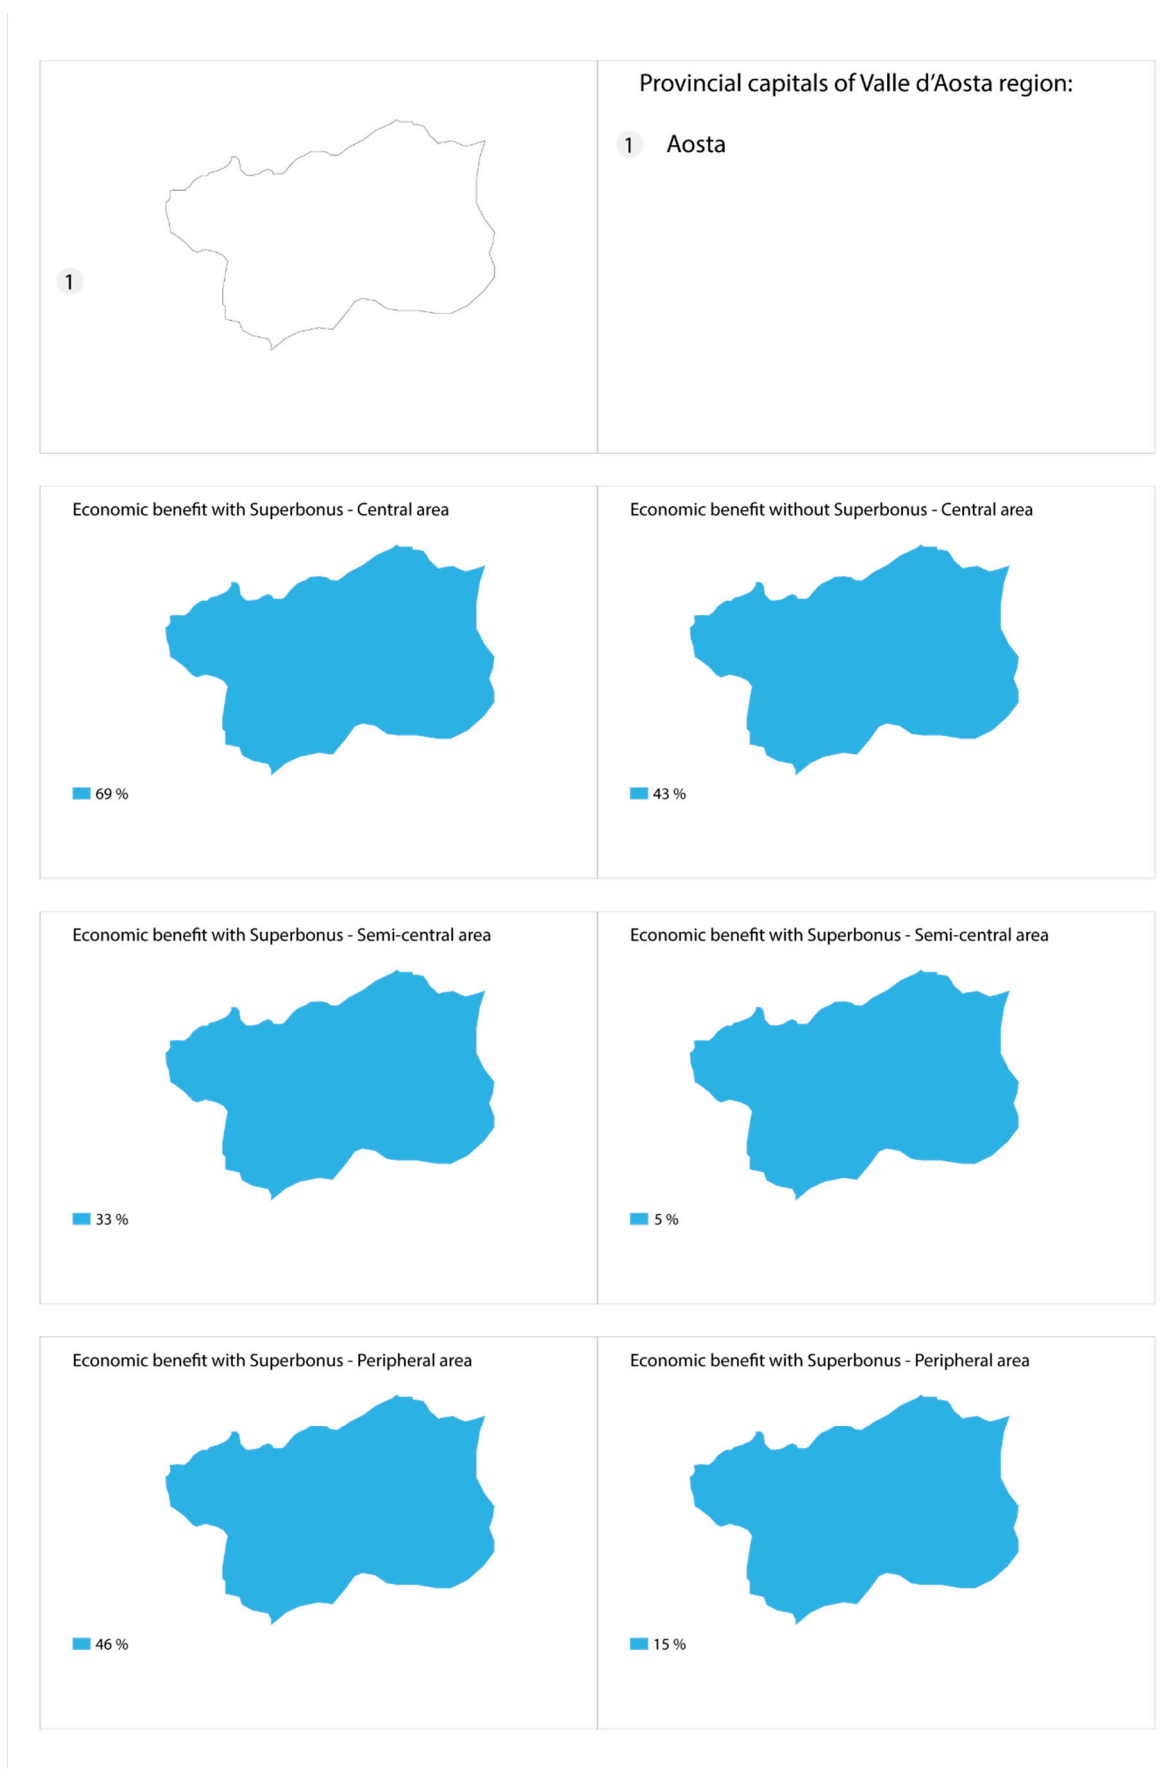

**Figure S1.** Convenience maps defined for the urban areas of the provincial capitals located in Valle d'Aosta region

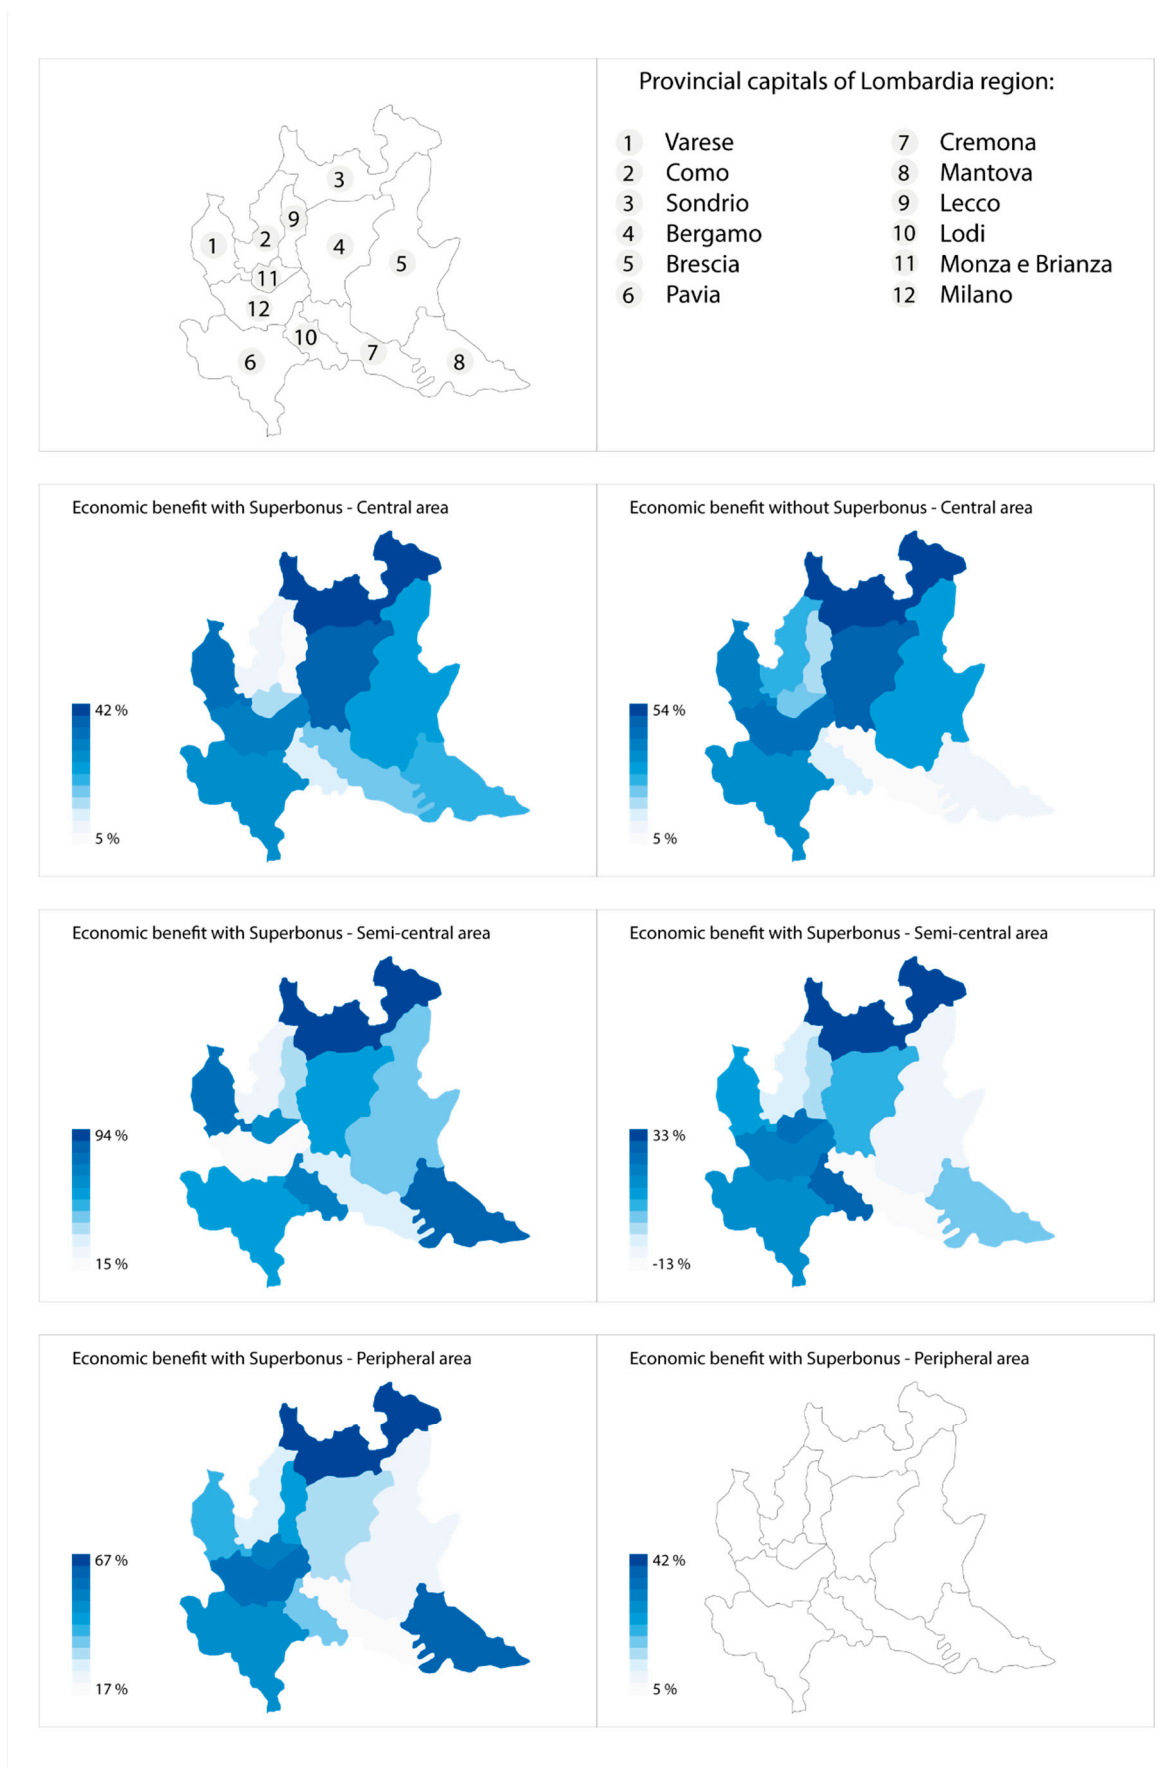

**Figure S2.** Convenience maps defined for the urban areas of the provincial capitals located in Lombardia region

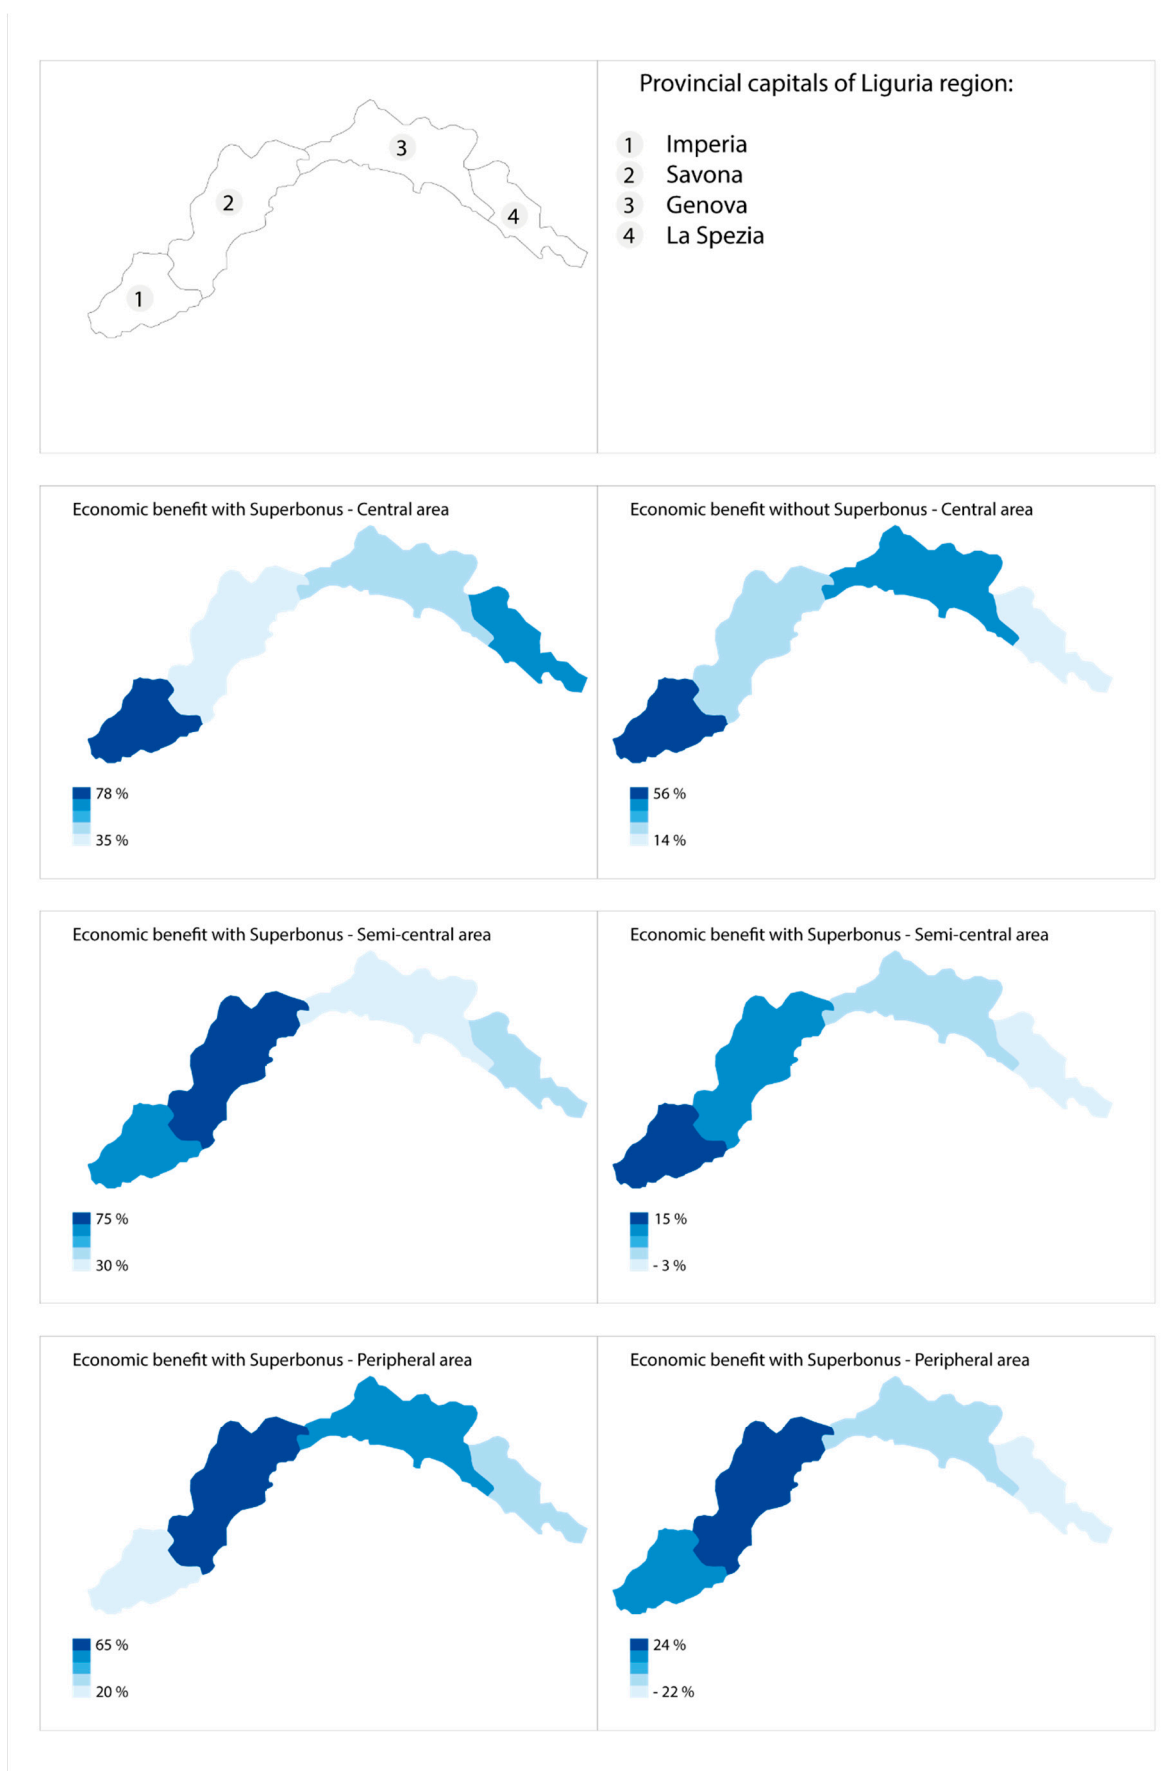

**Figure S3.** Convenience maps defined for the urban areas of the provincial capitals located in Liguria region



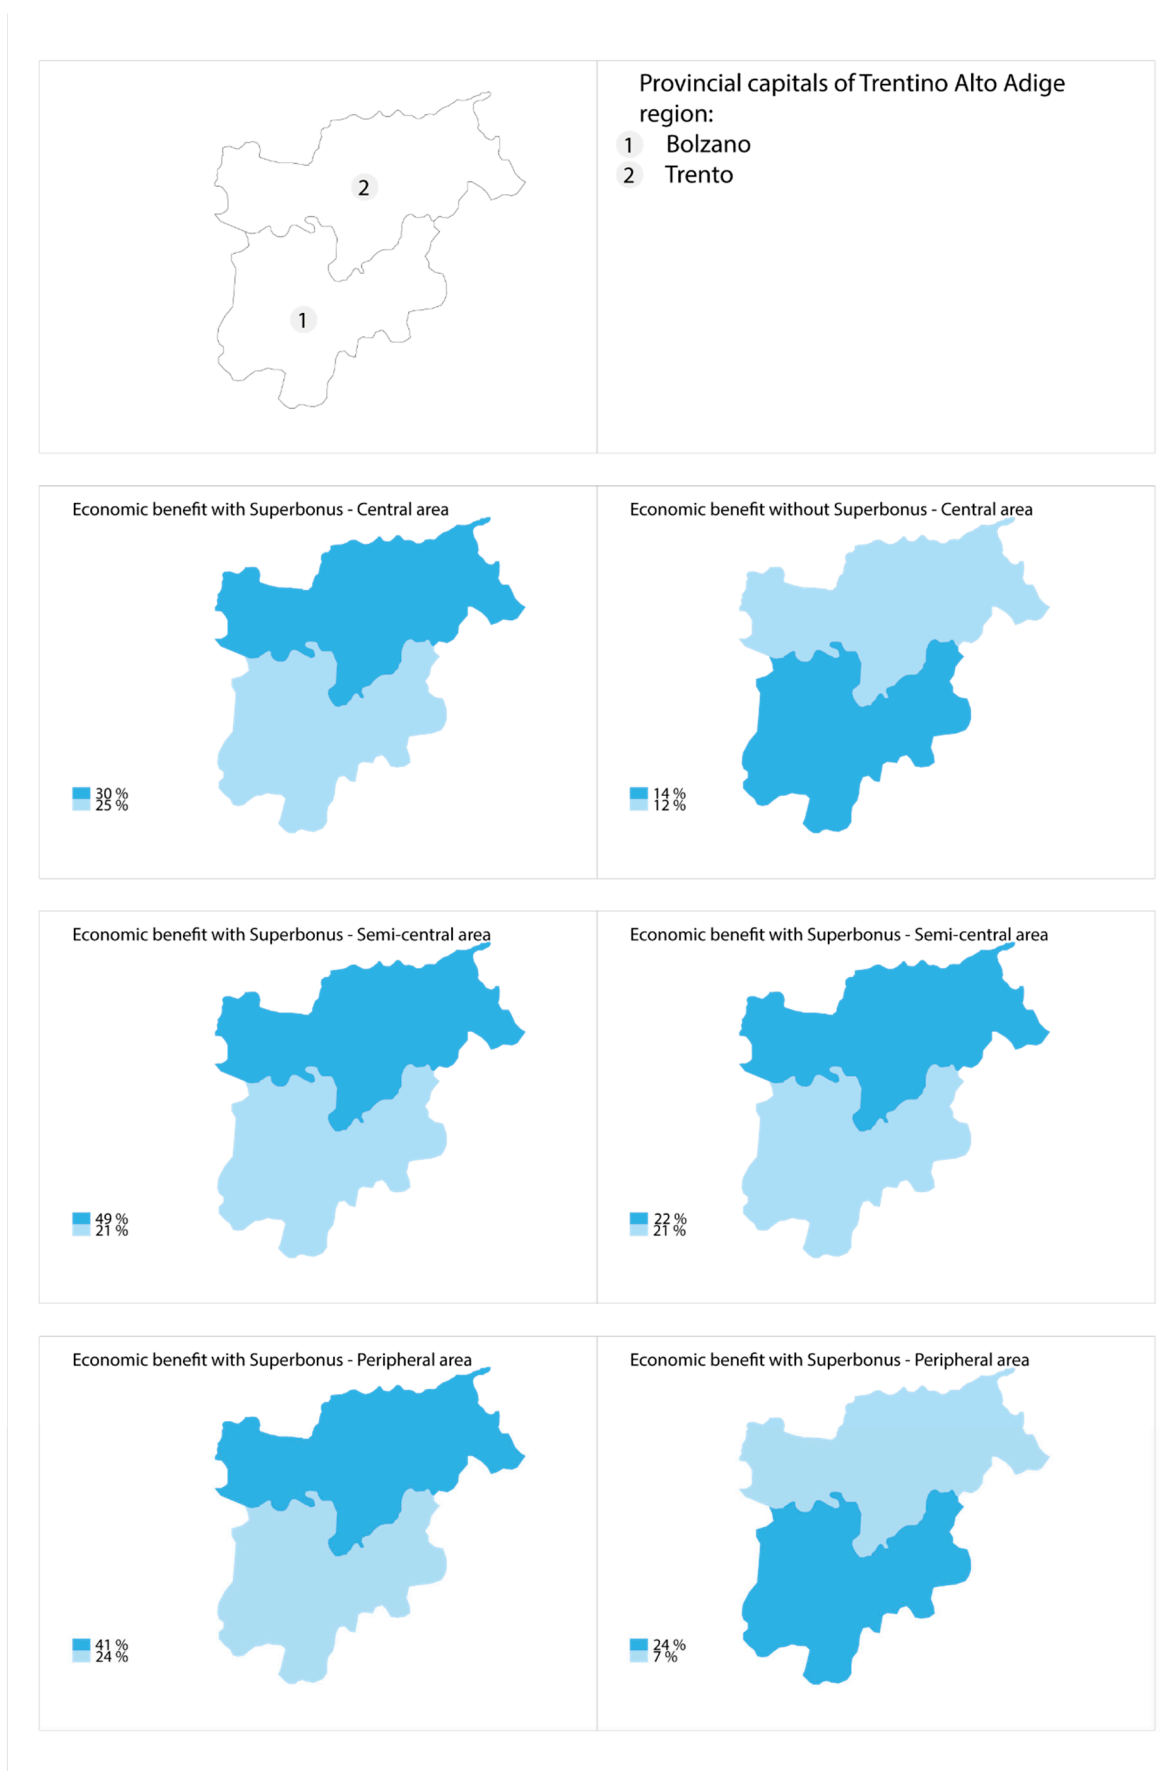

**Figure S4.** Convenience maps defined for the urban areas of the provincial capitals located in Trentino Alto Adige region

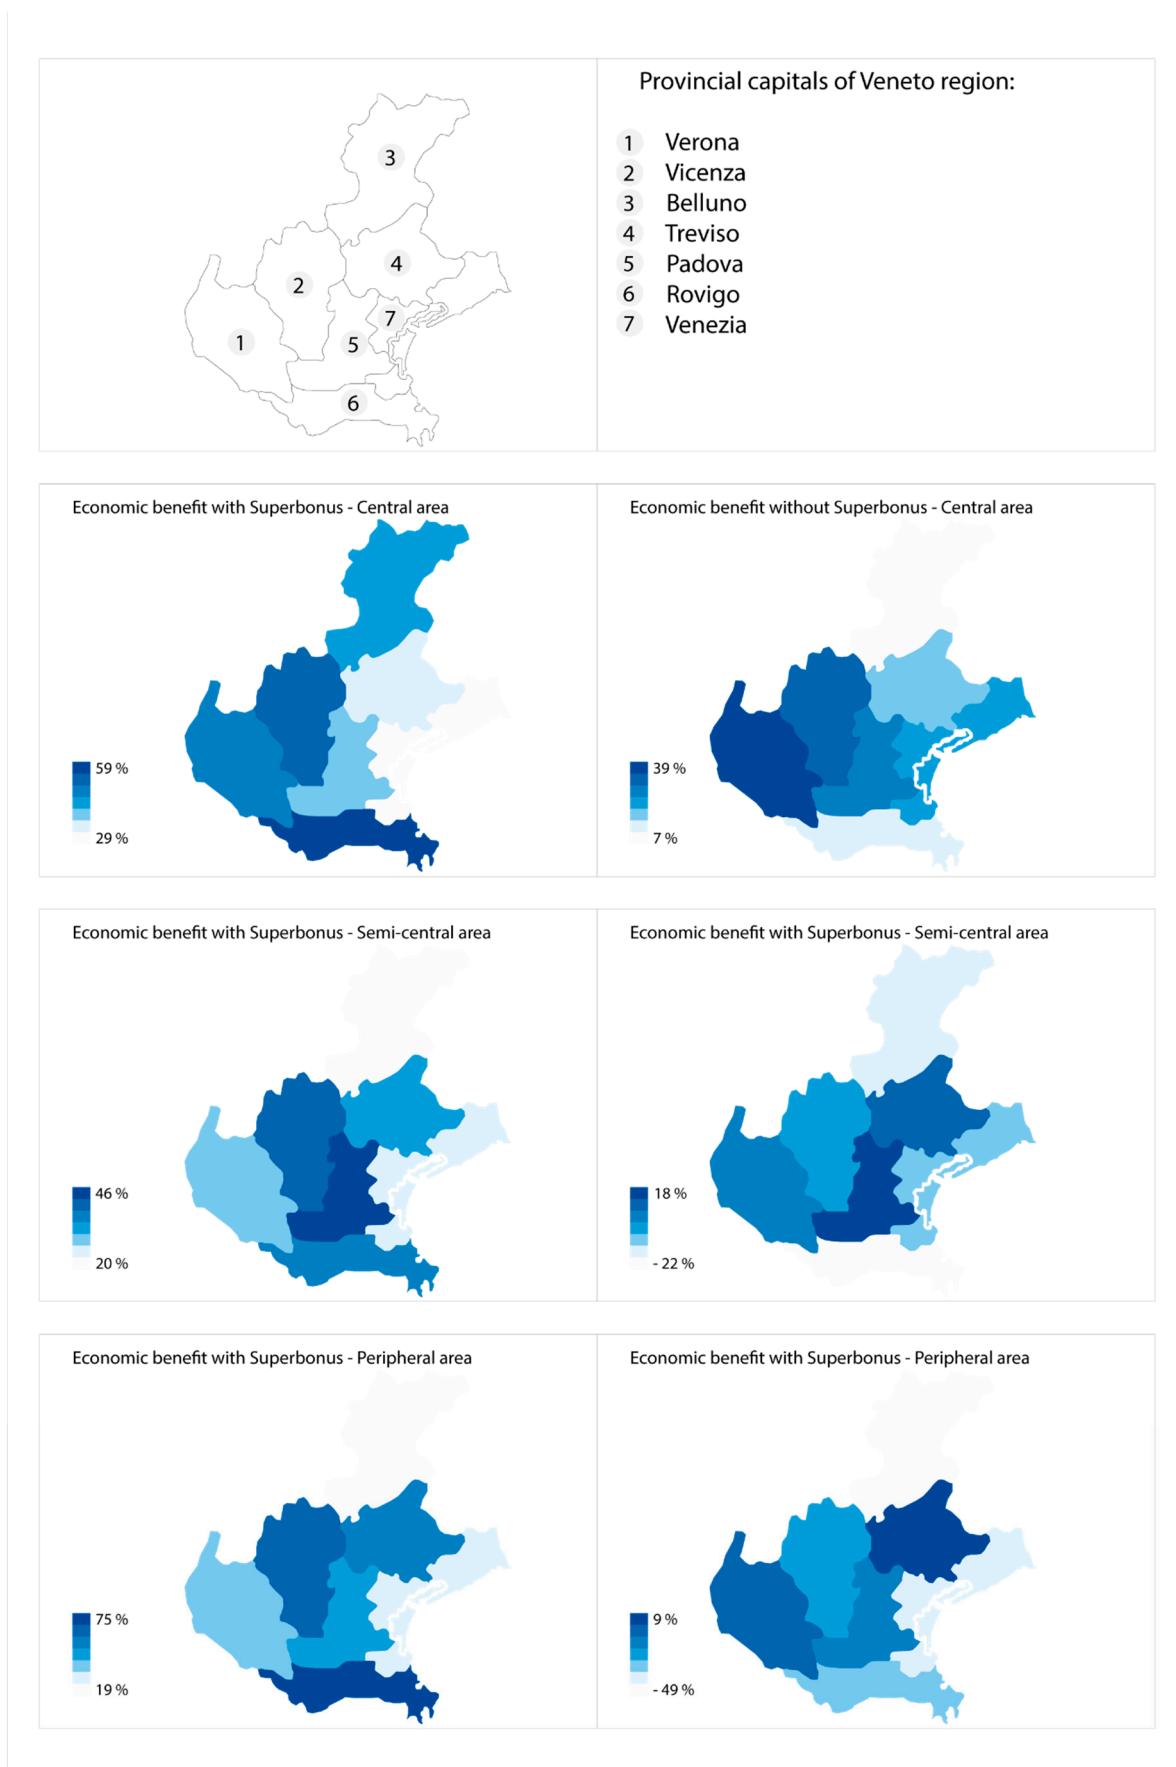

**Figure S5.** Convenience maps defined for the urban areas of the provincial capitals located in Veneto region

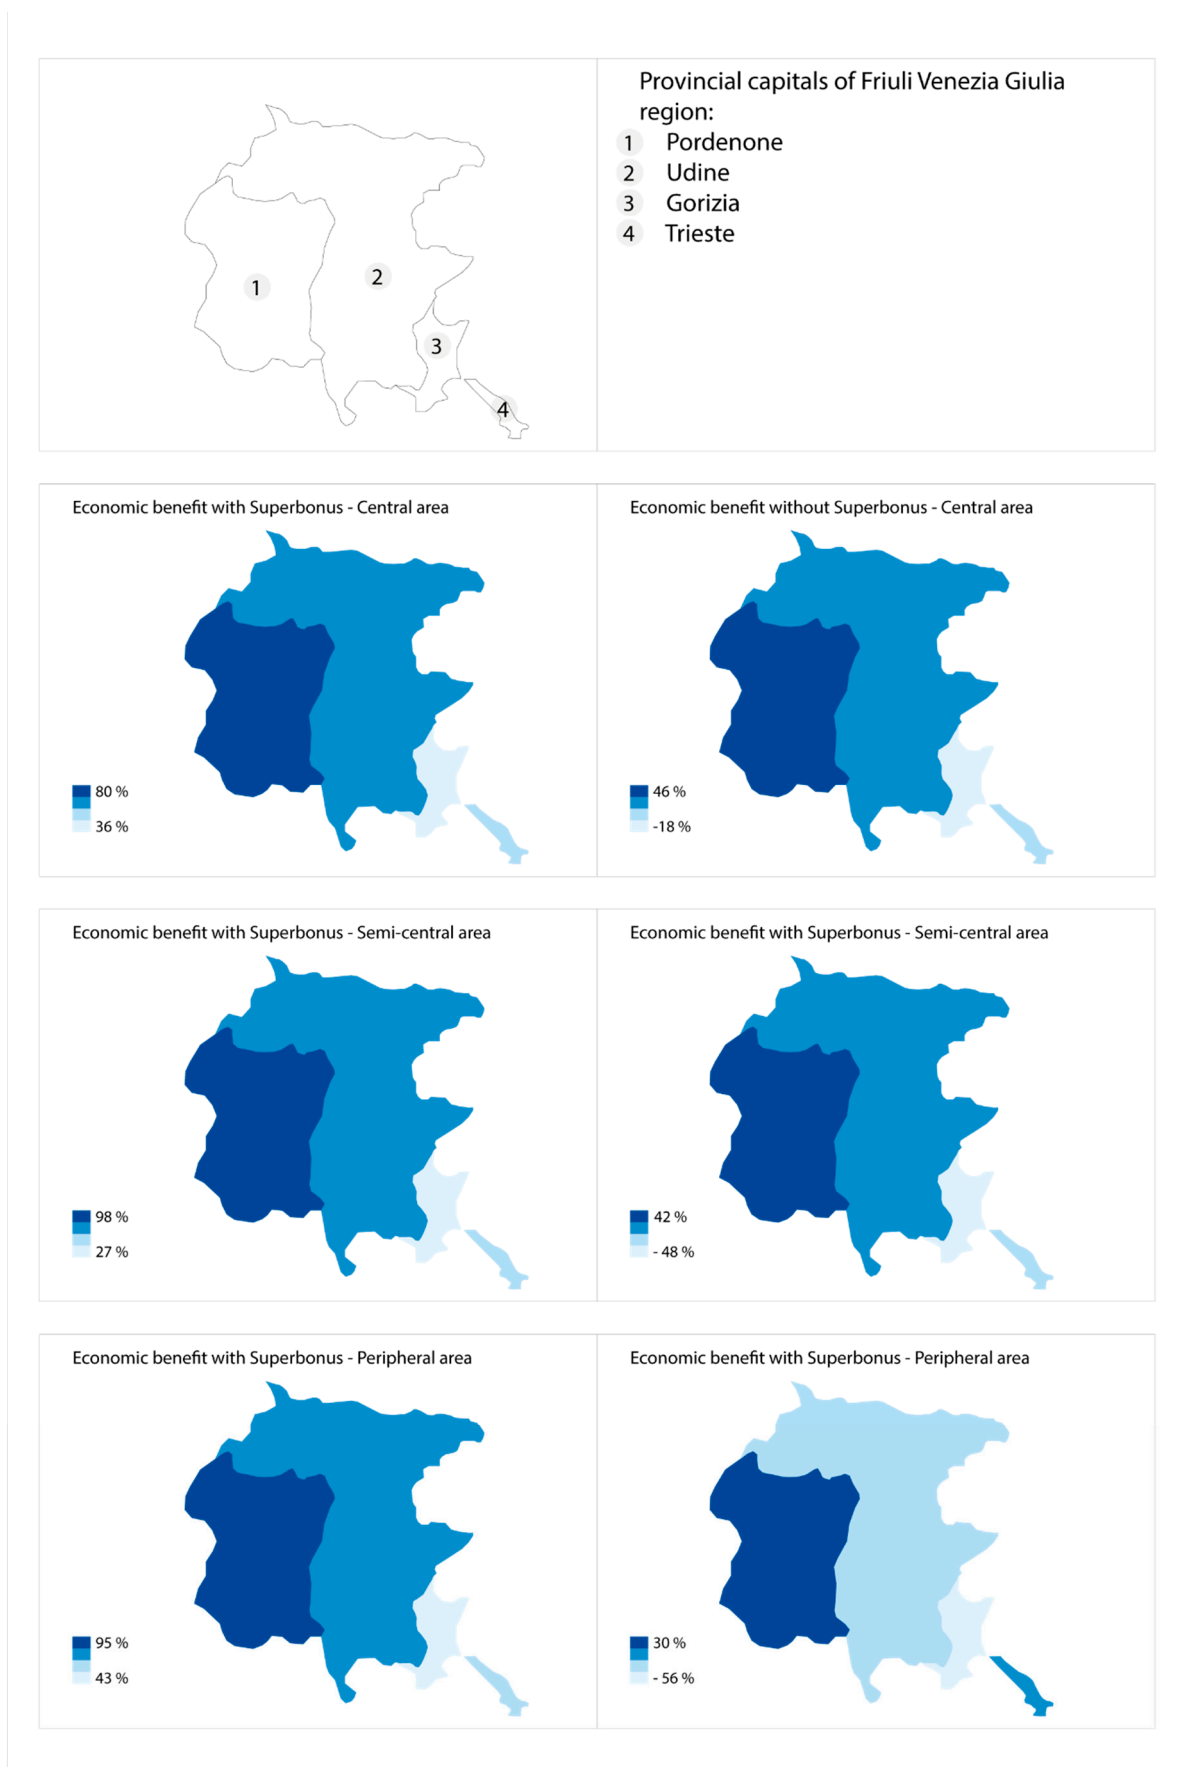

**Figure S6.** Convenience maps defined for the urban areas of the provincial capitals located in Friuli Venezia Giulia region

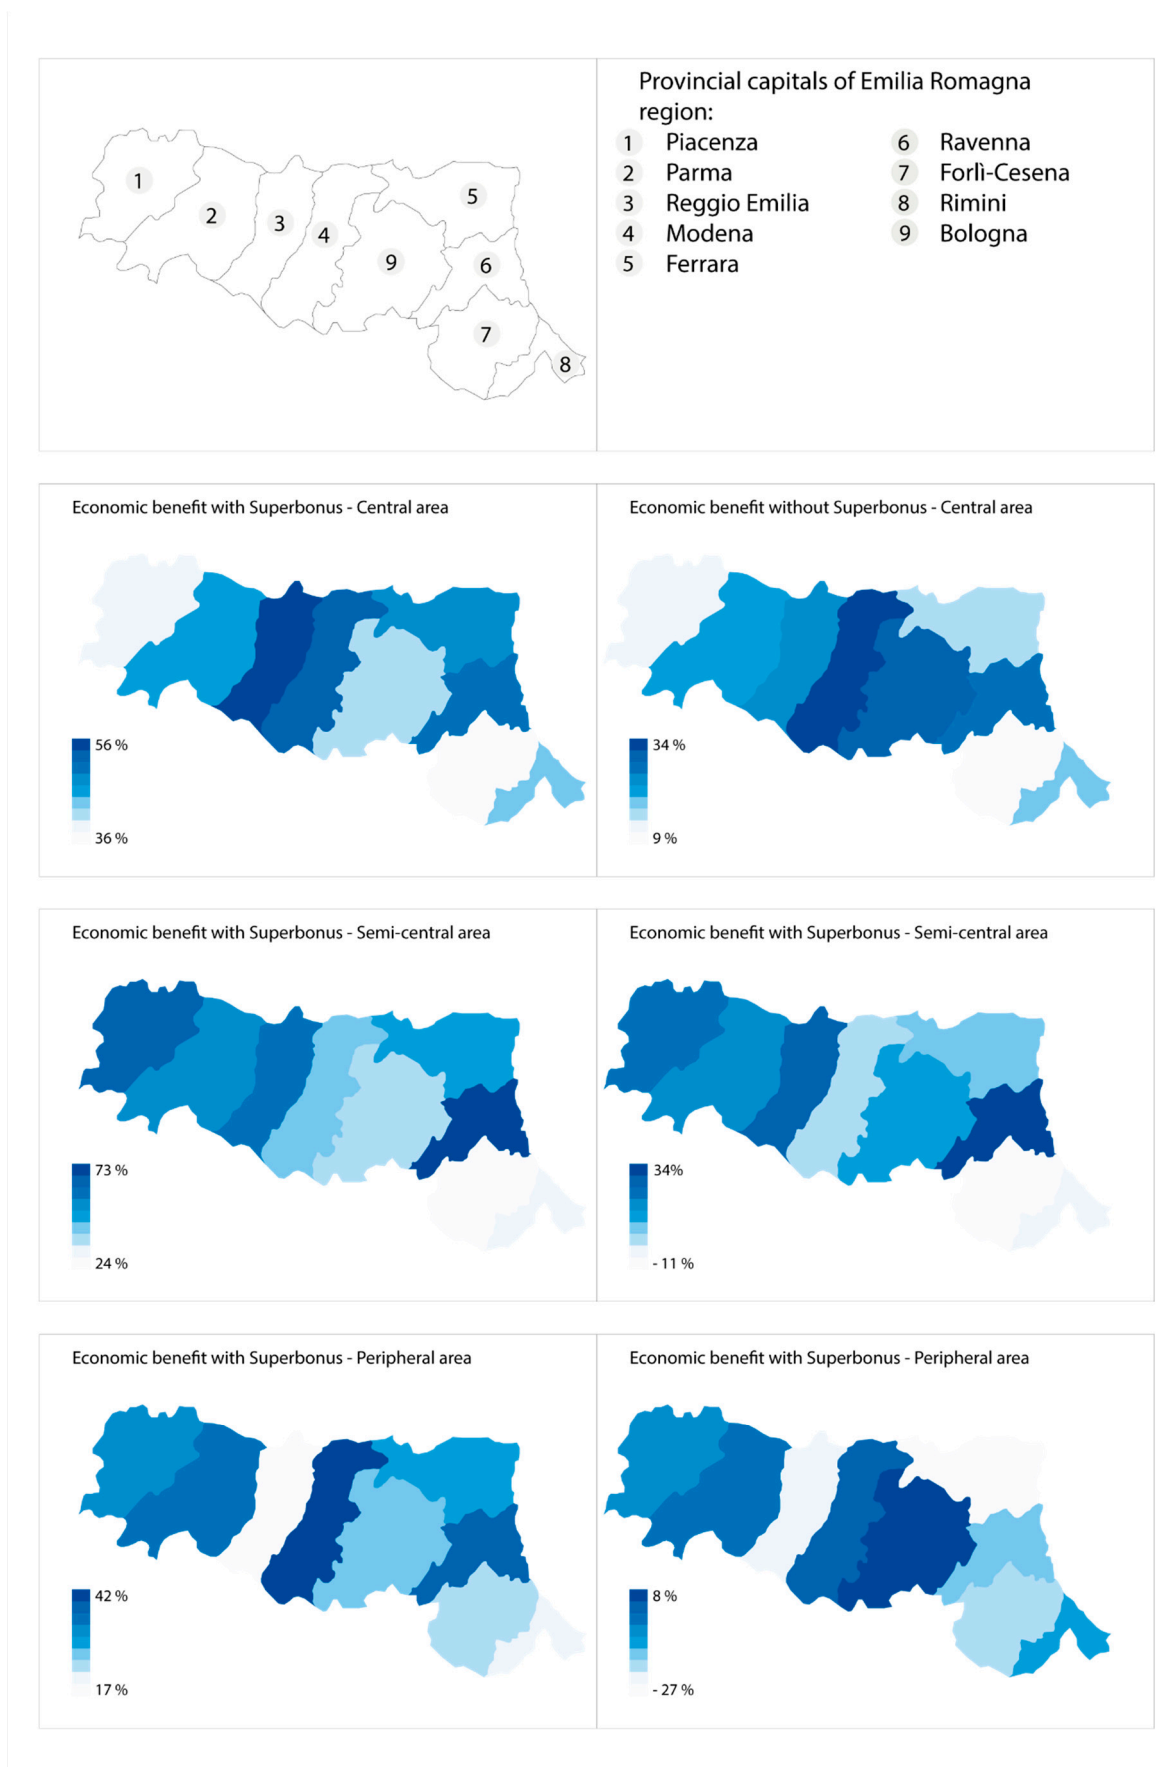

**Figure S7.** Convenience maps defined for the urban areas of the provincial capitals located in Emilia Romagna region

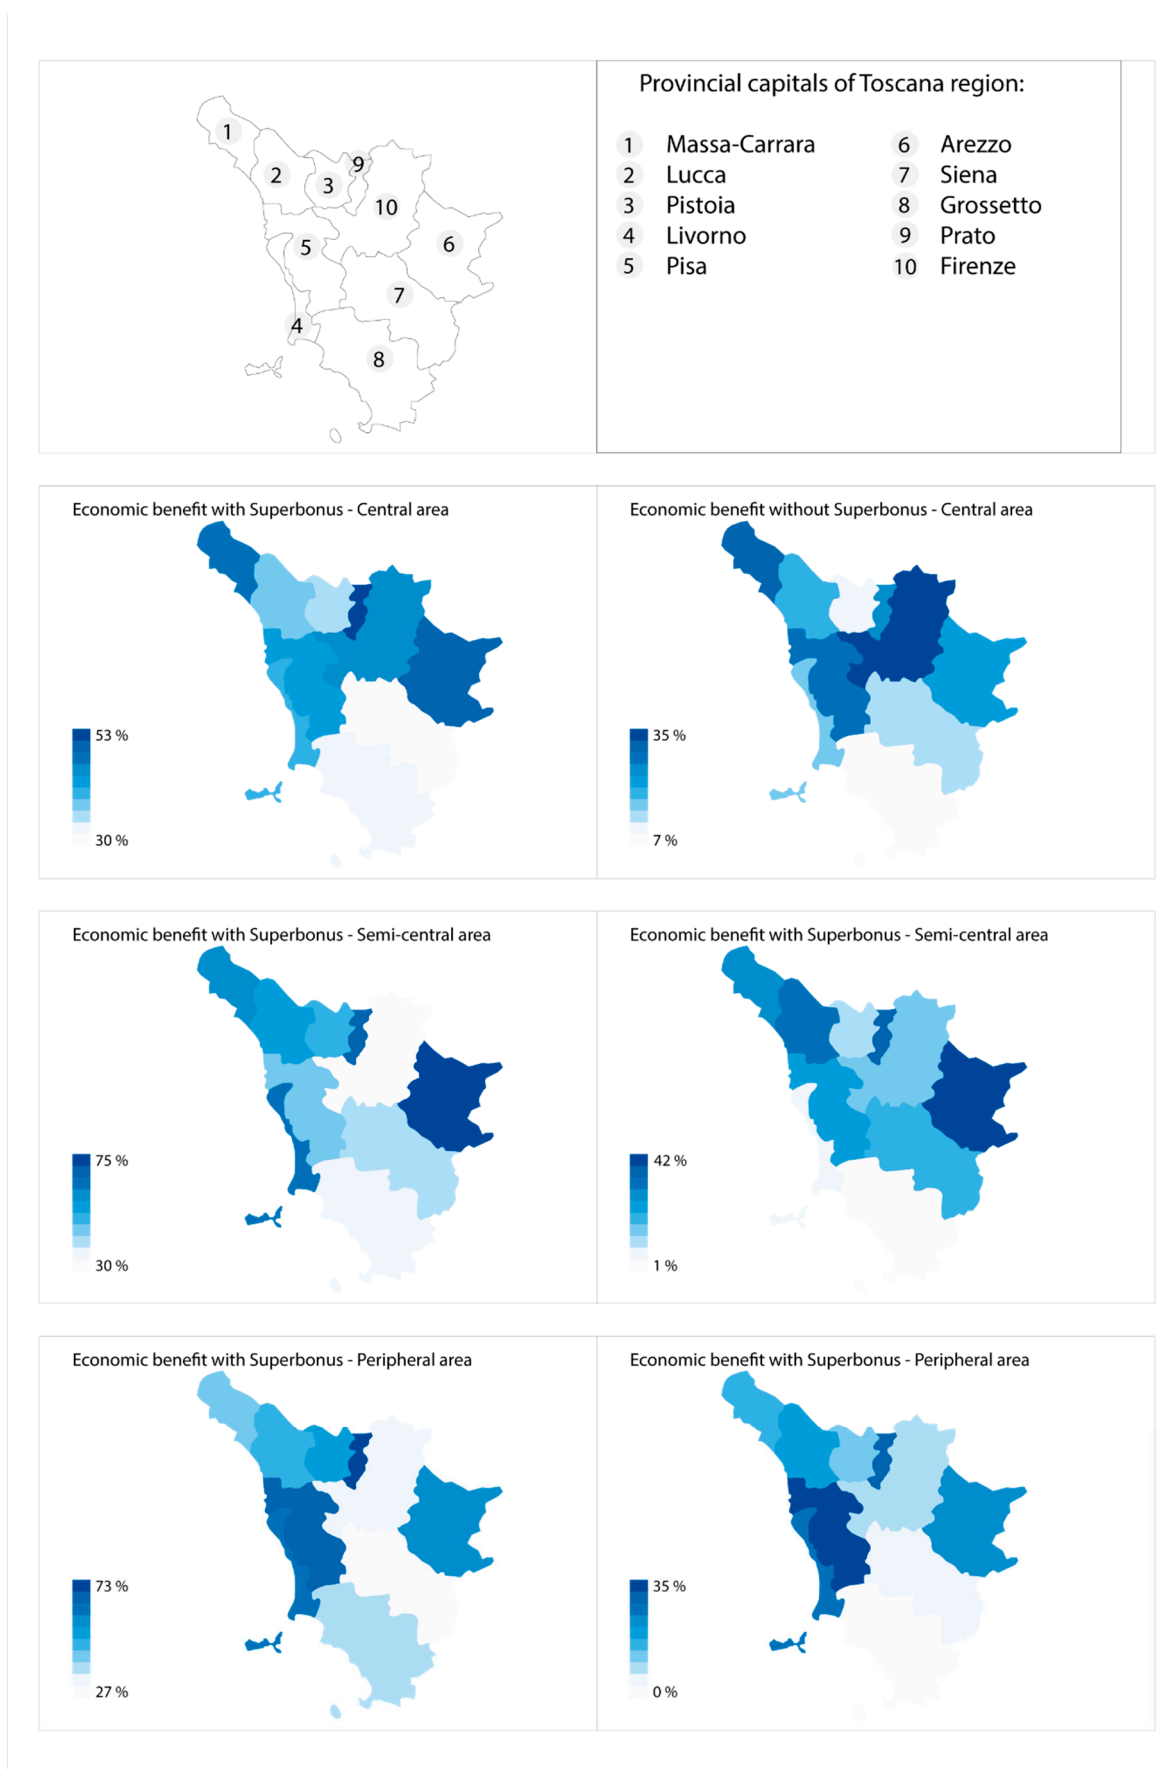

**Figure S8.** Convenience maps defined for the urban areas of the provincial capitals located in Toscana region

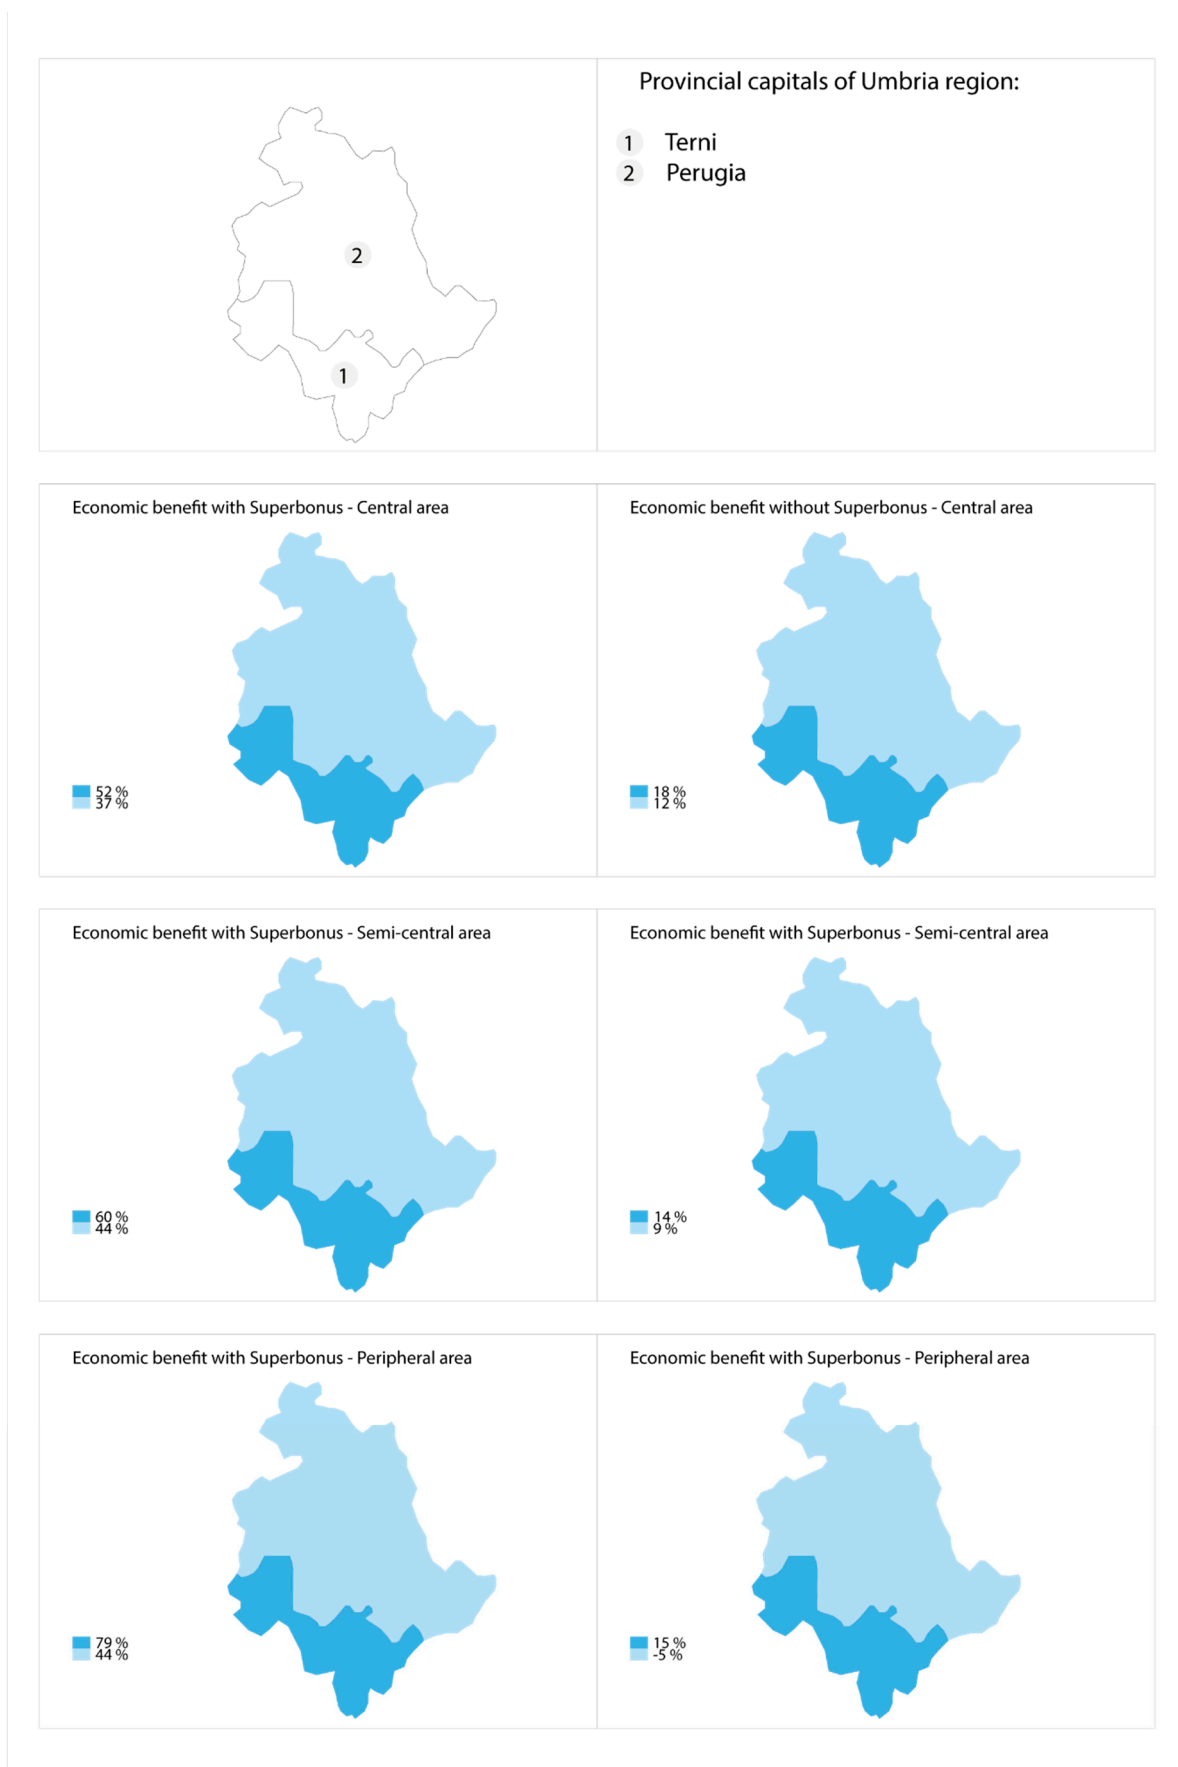

**Figure S9.** Convenience maps defined for the urban areas of the provincial capitals located in Umbria region

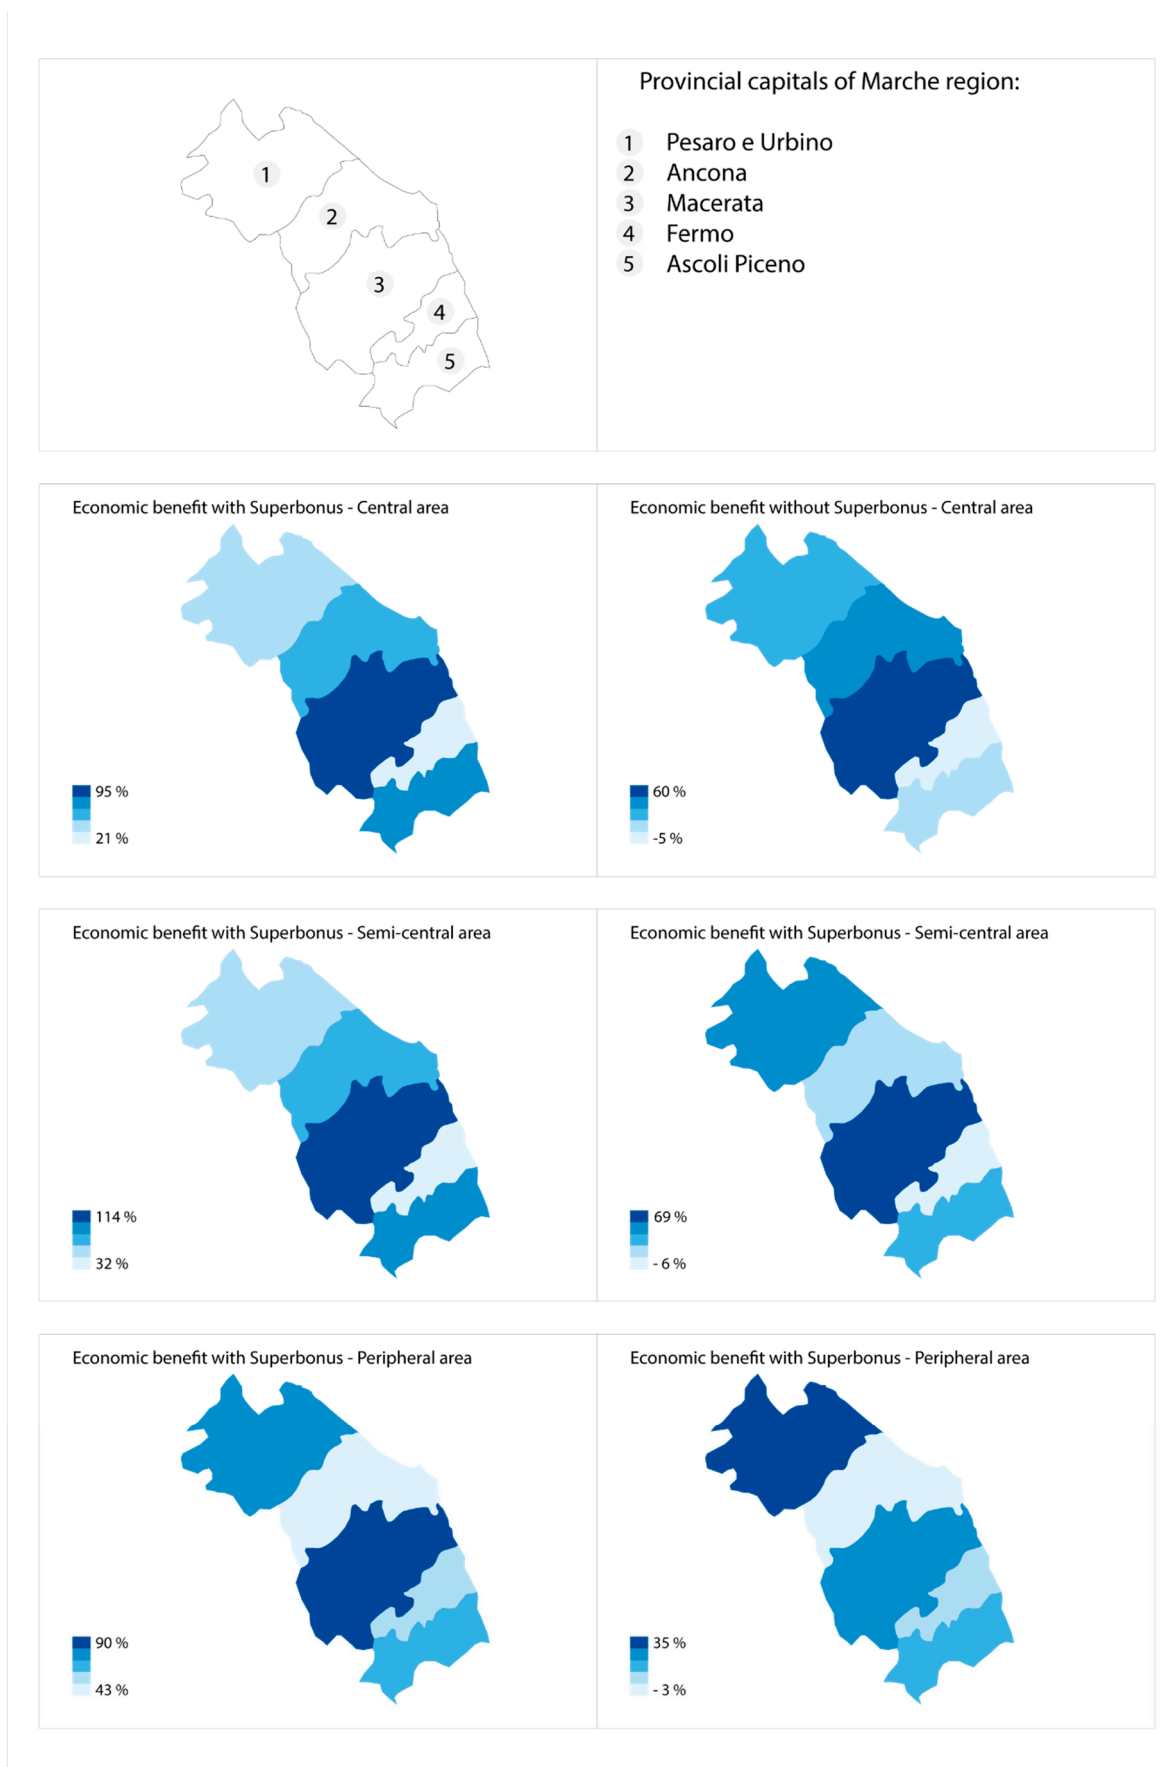

**Figure S10.** Convenience maps defined for the urban areas of the provincial capitals located in Marche region

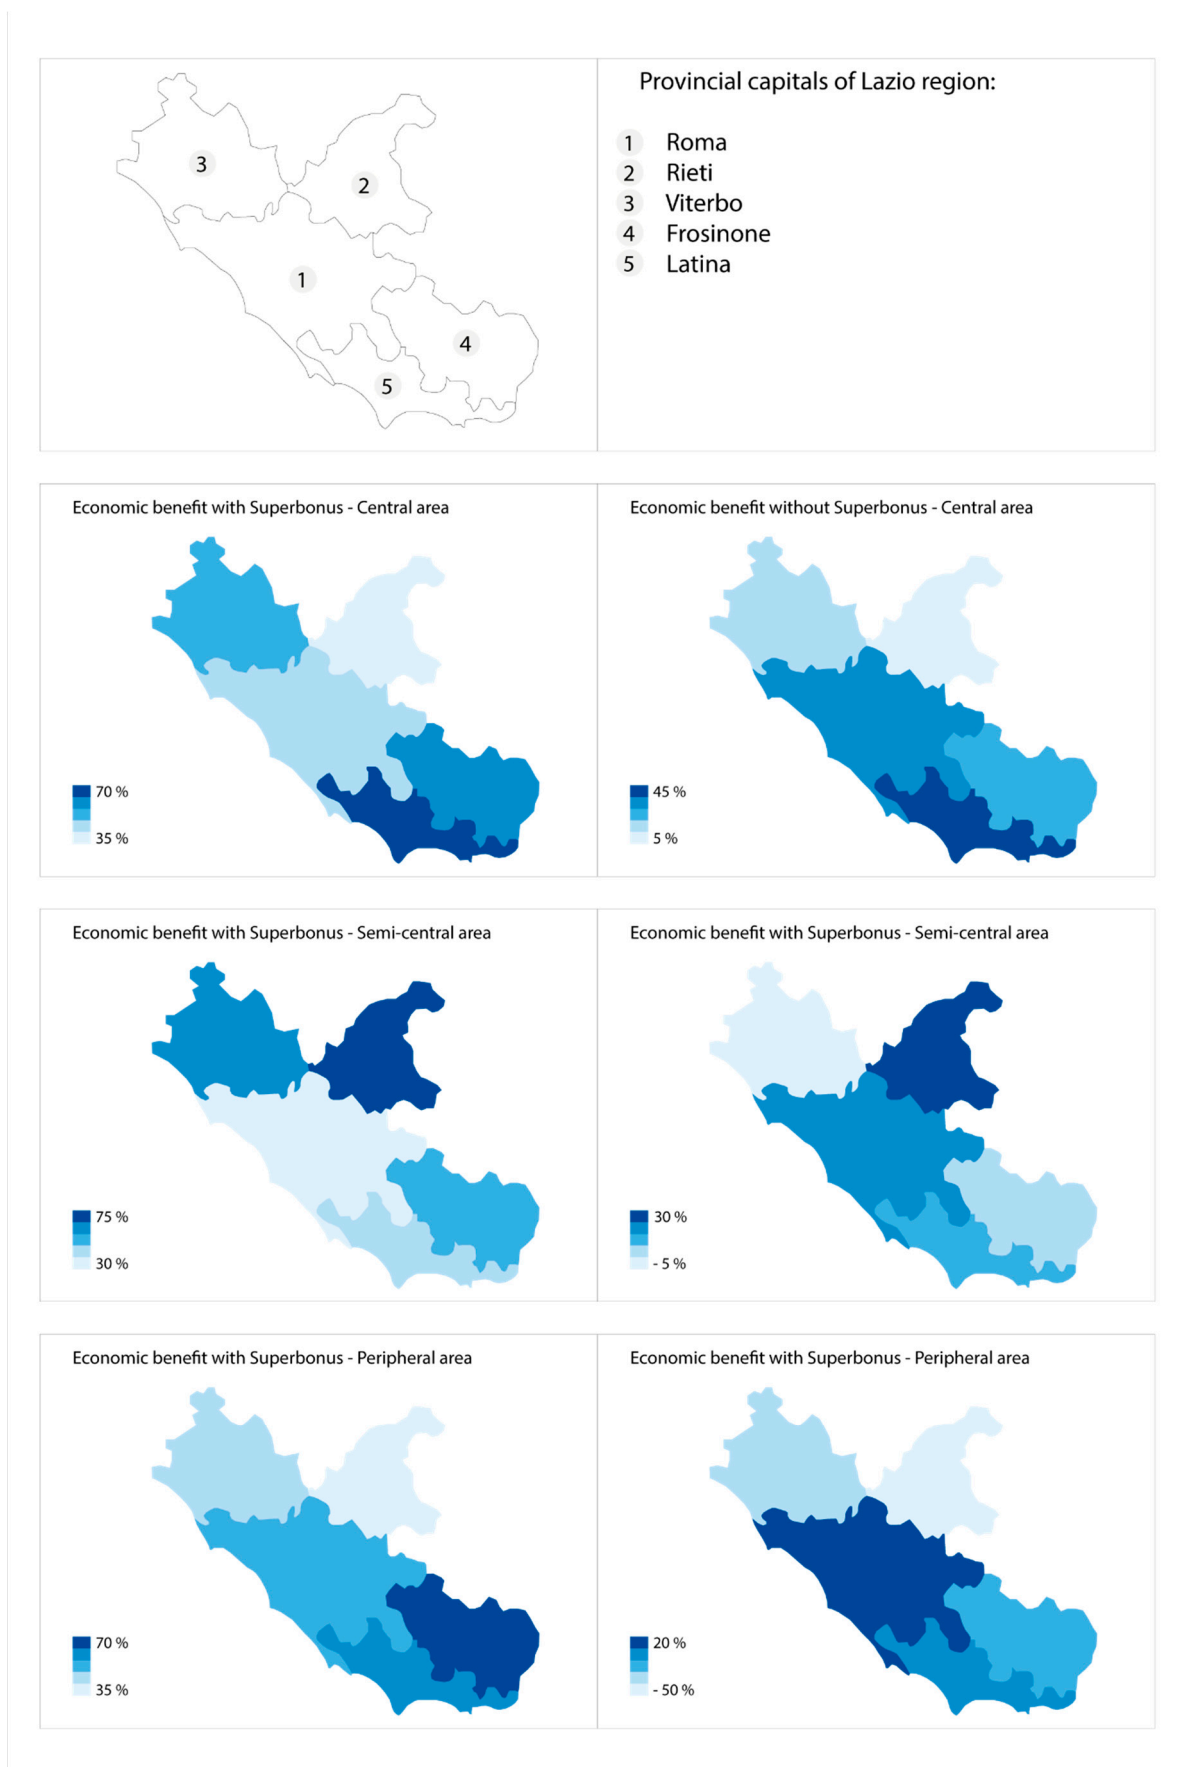

**Figure S11.** Convenience maps defined for the urban areas of the provincial capitals located in Lazio region



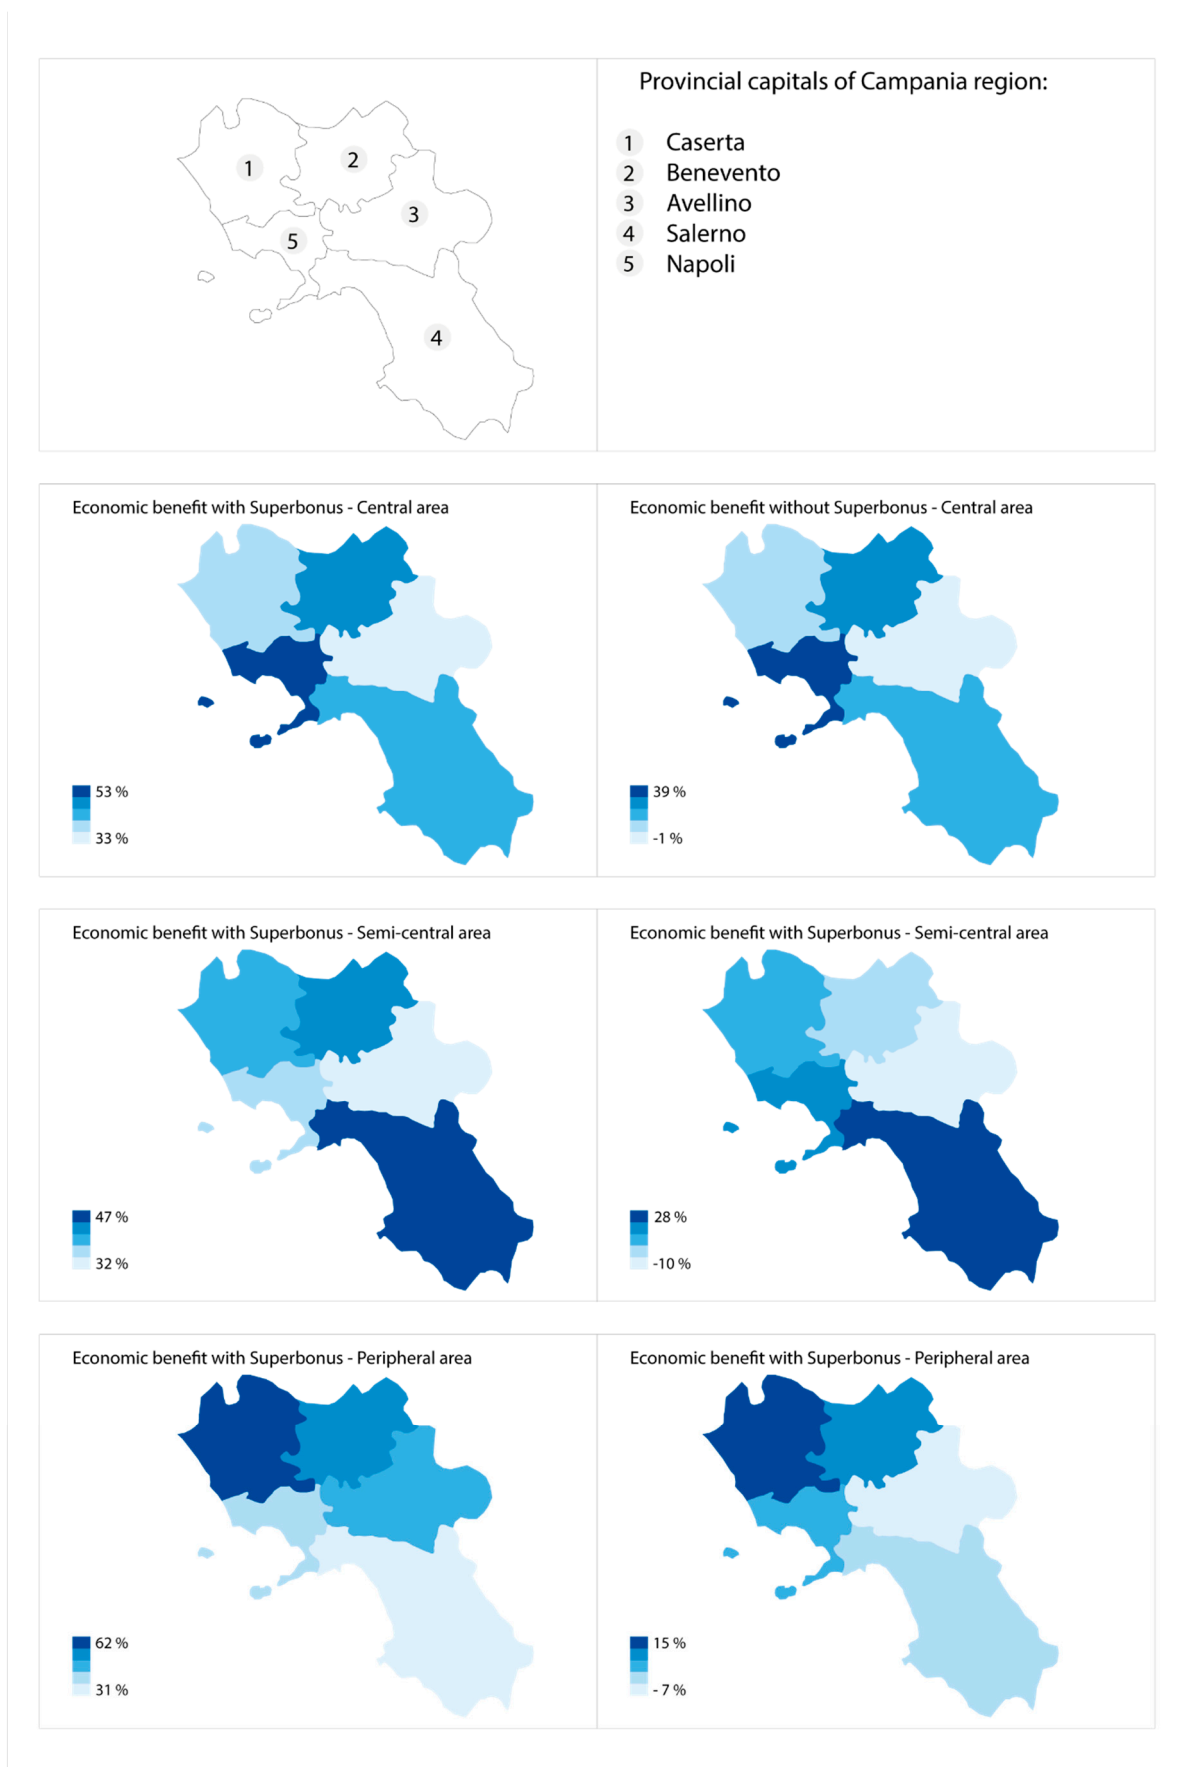

**Figure S12.** Convenience maps defined for the urban areas of the provincial capitals located in Campania region

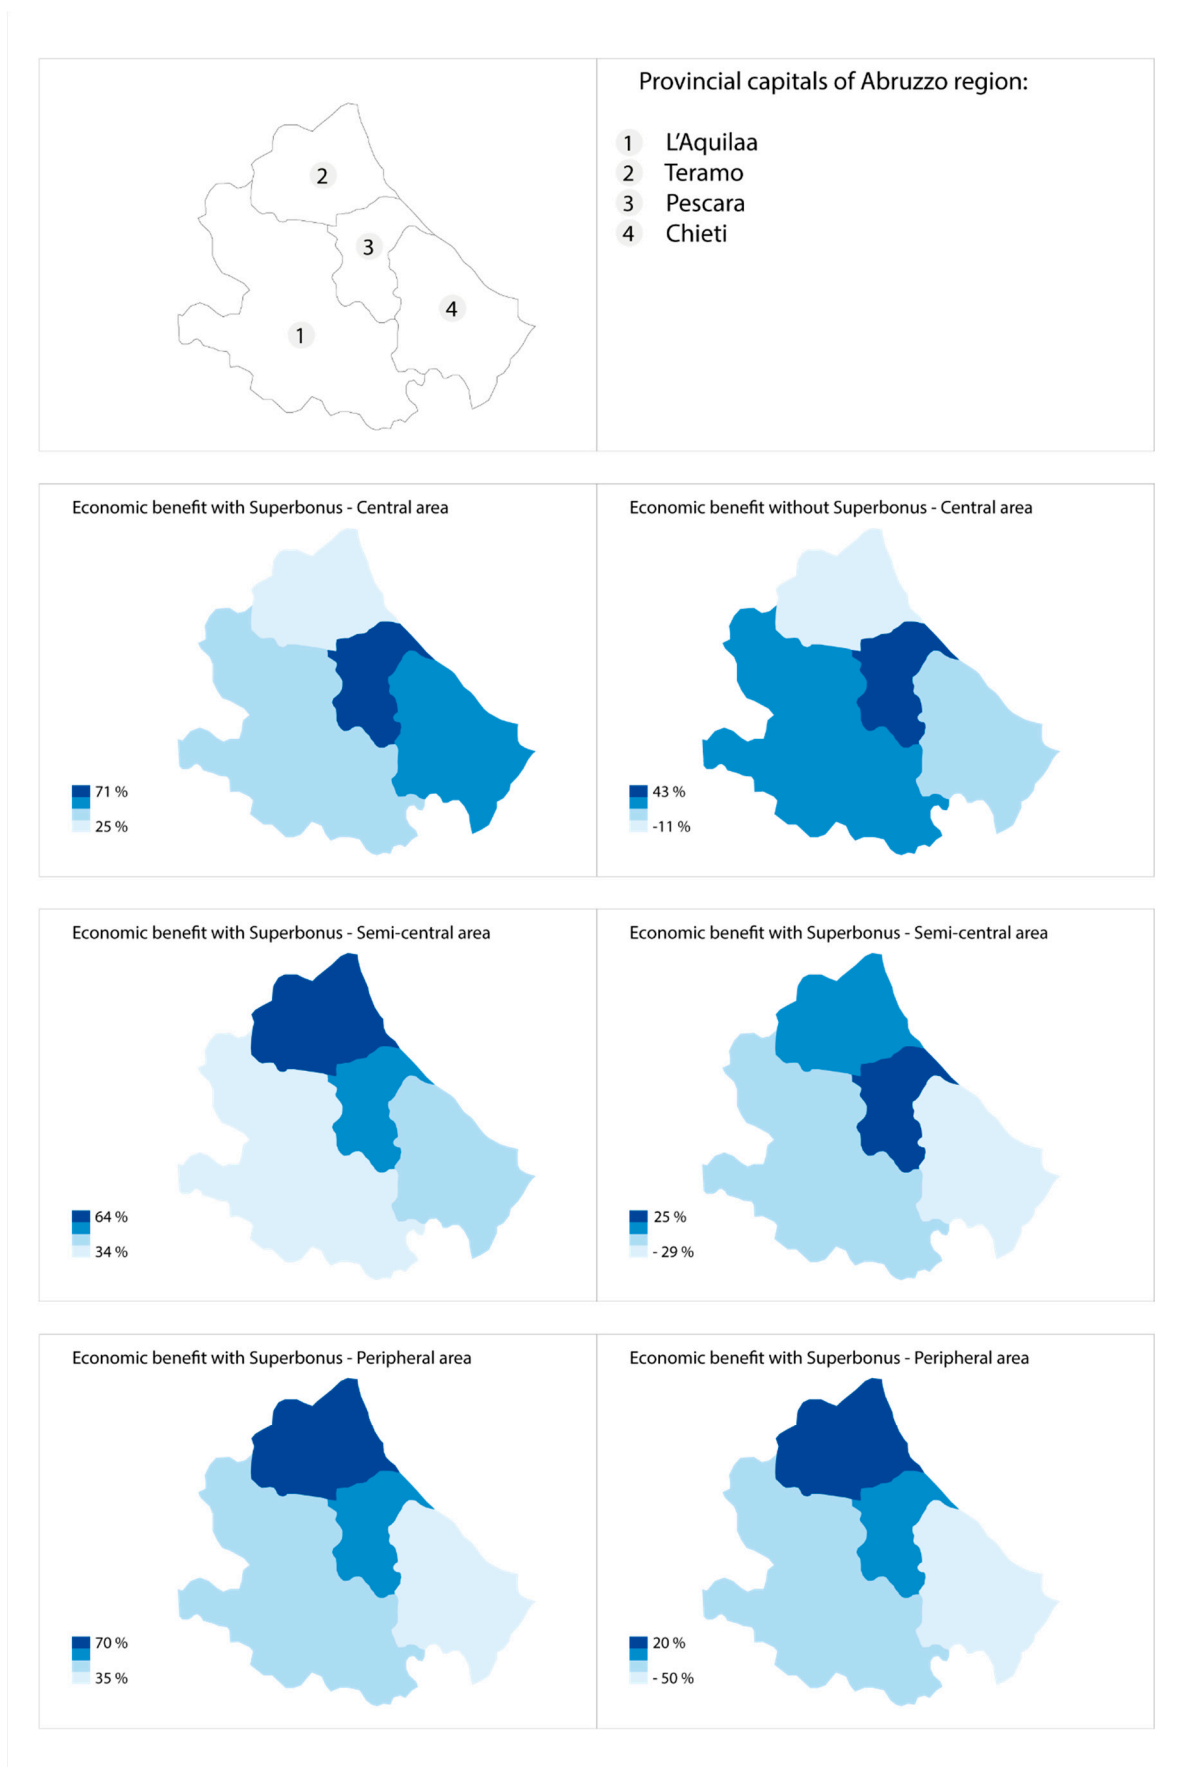

**Figure S13.** Convenience maps defined for the urban areas of the provincial capitals located in Abruzzo region

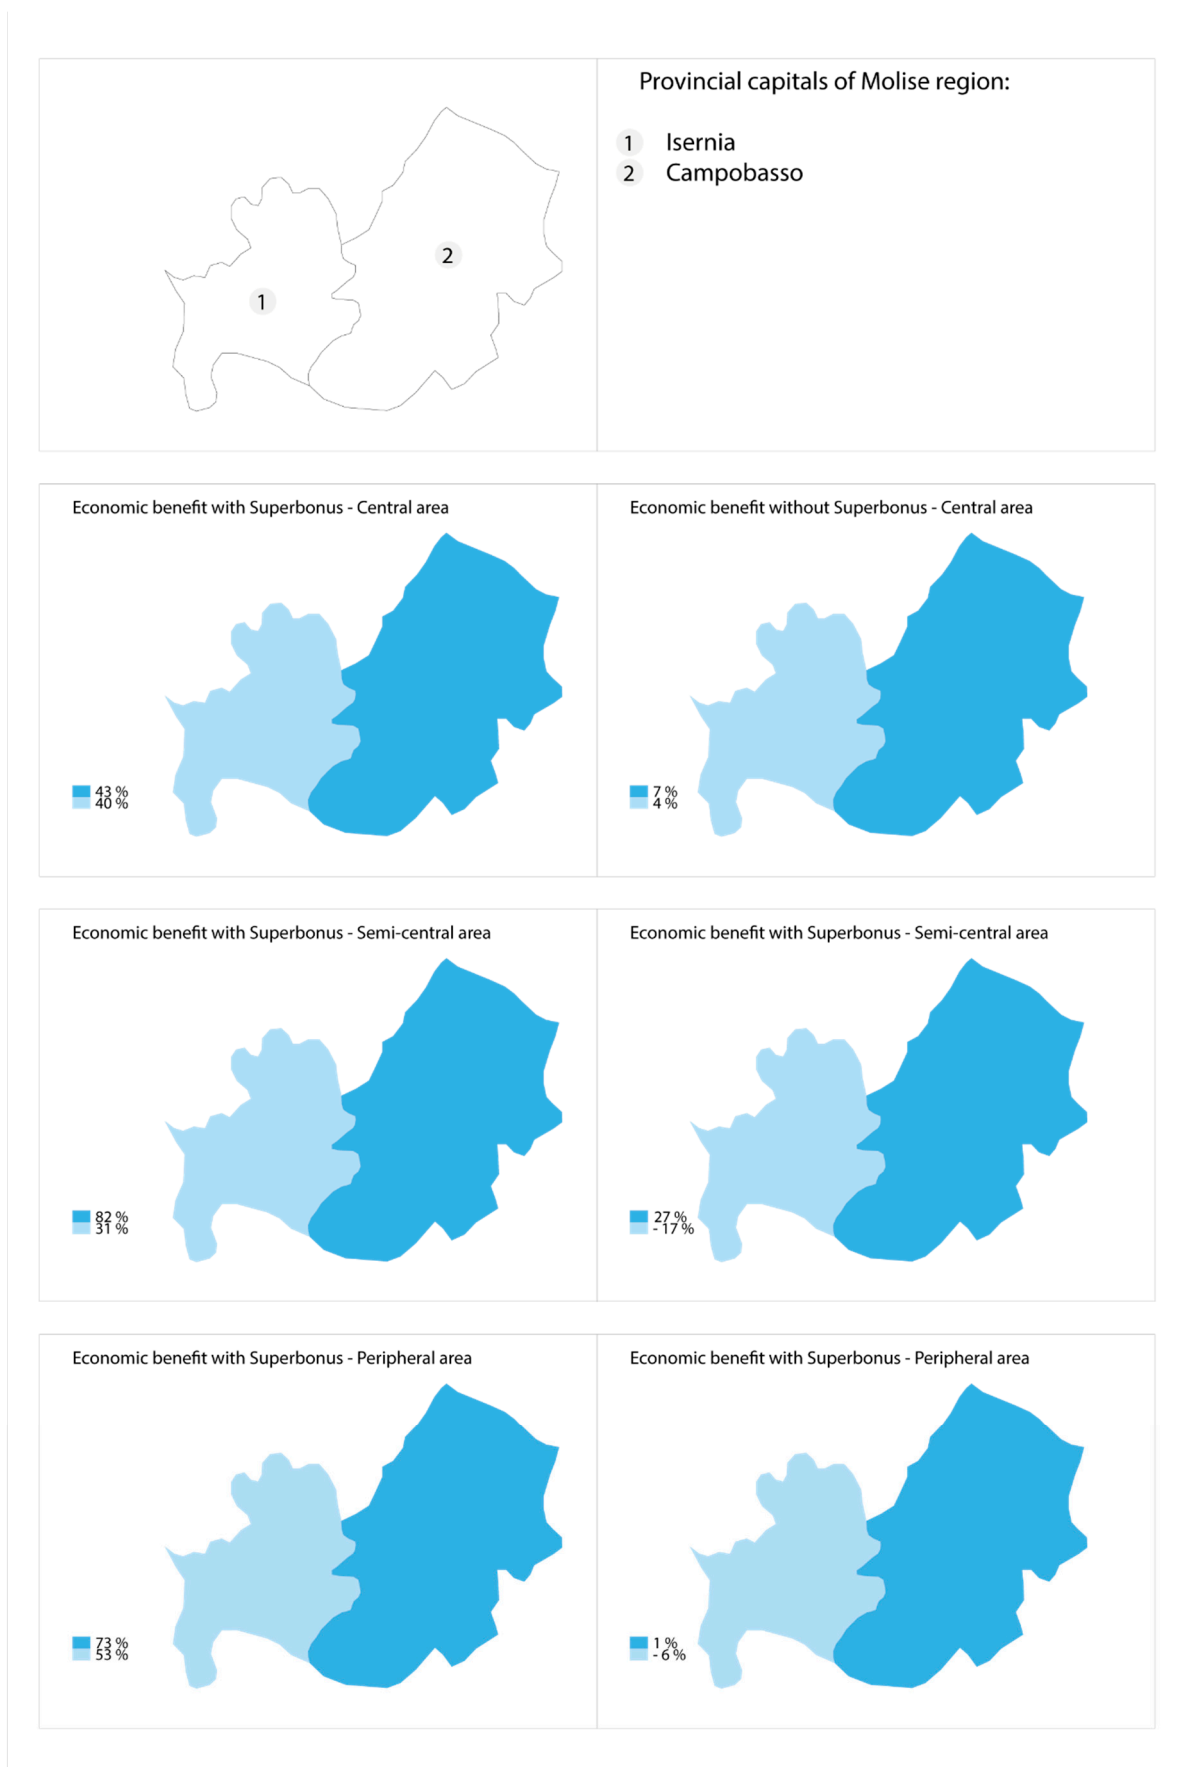

**Figure S14.** Convenience maps defined for the urban areas of the provincial capitals located in Molise region

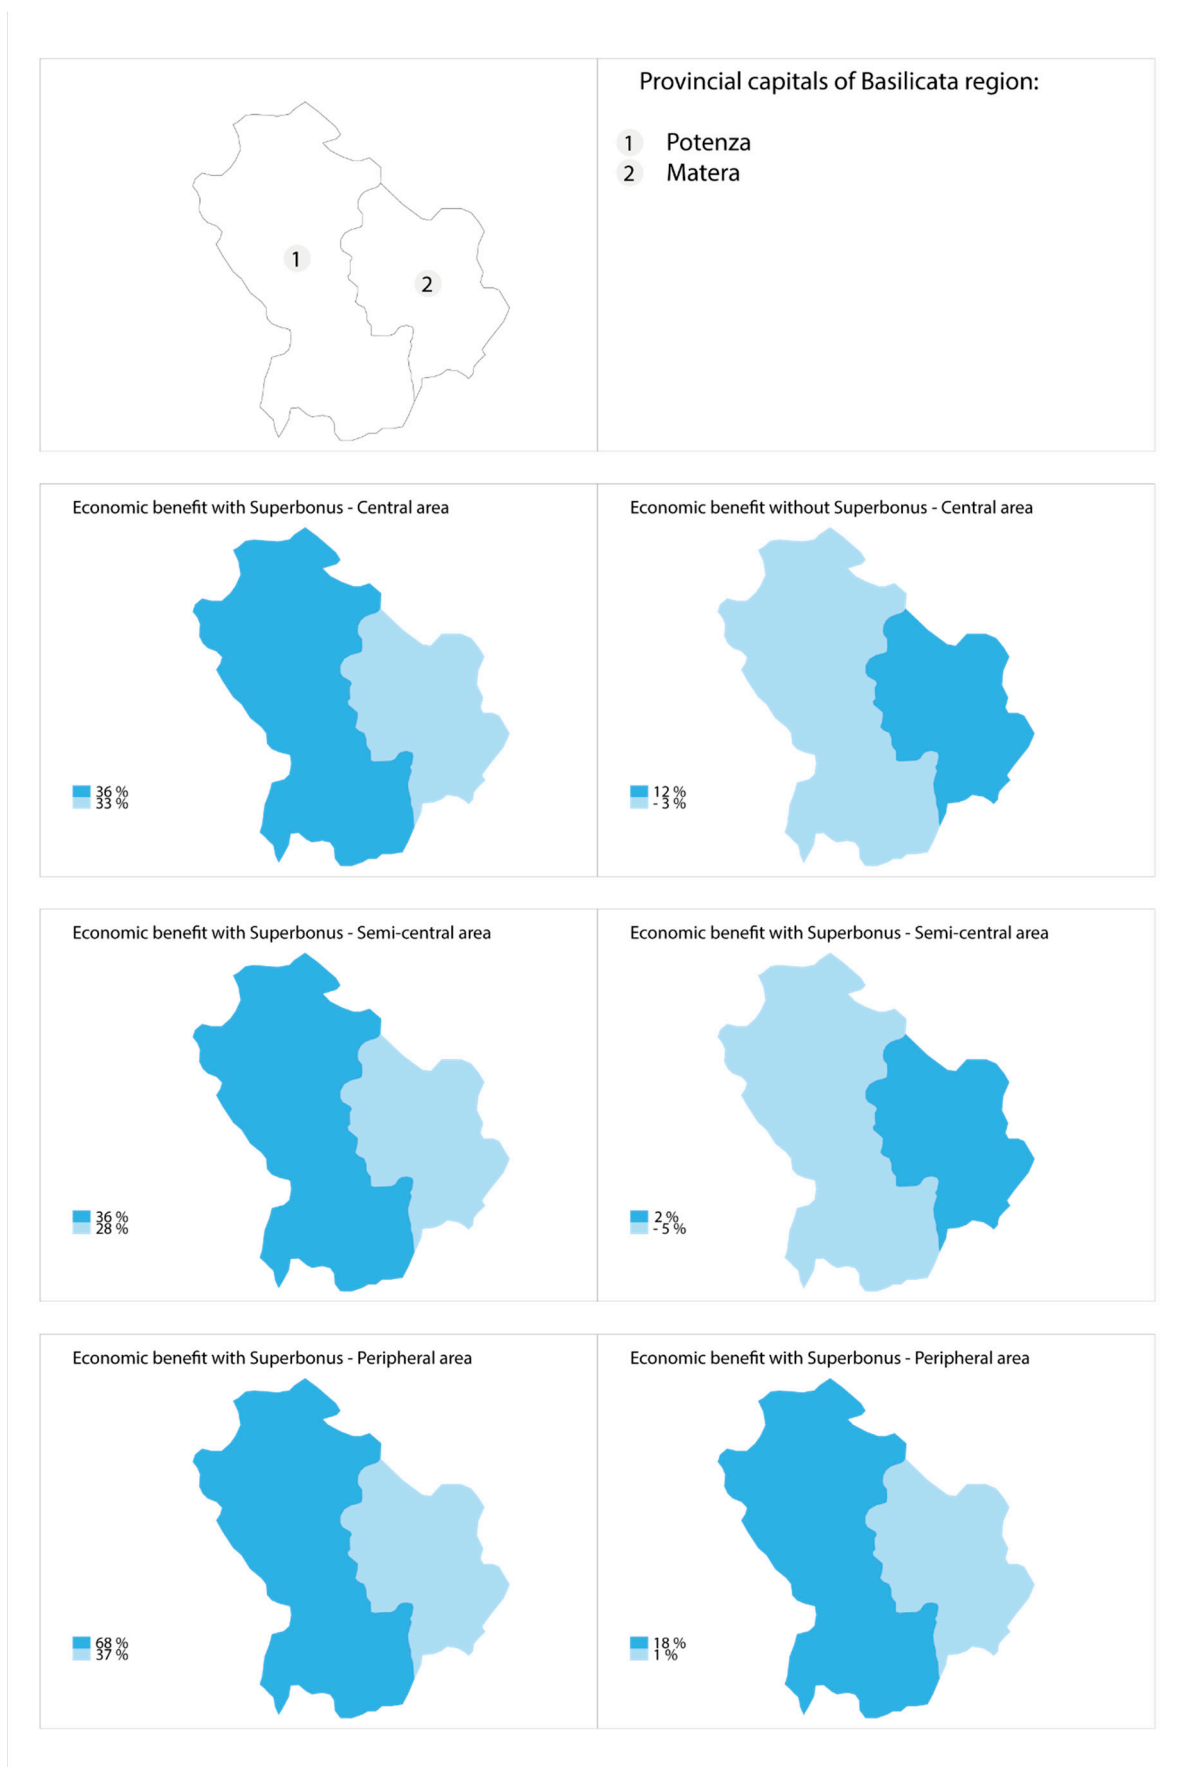

**Figure S15.** Convenience maps defined for the urban areas of the provincial capitals located in Basilicata region

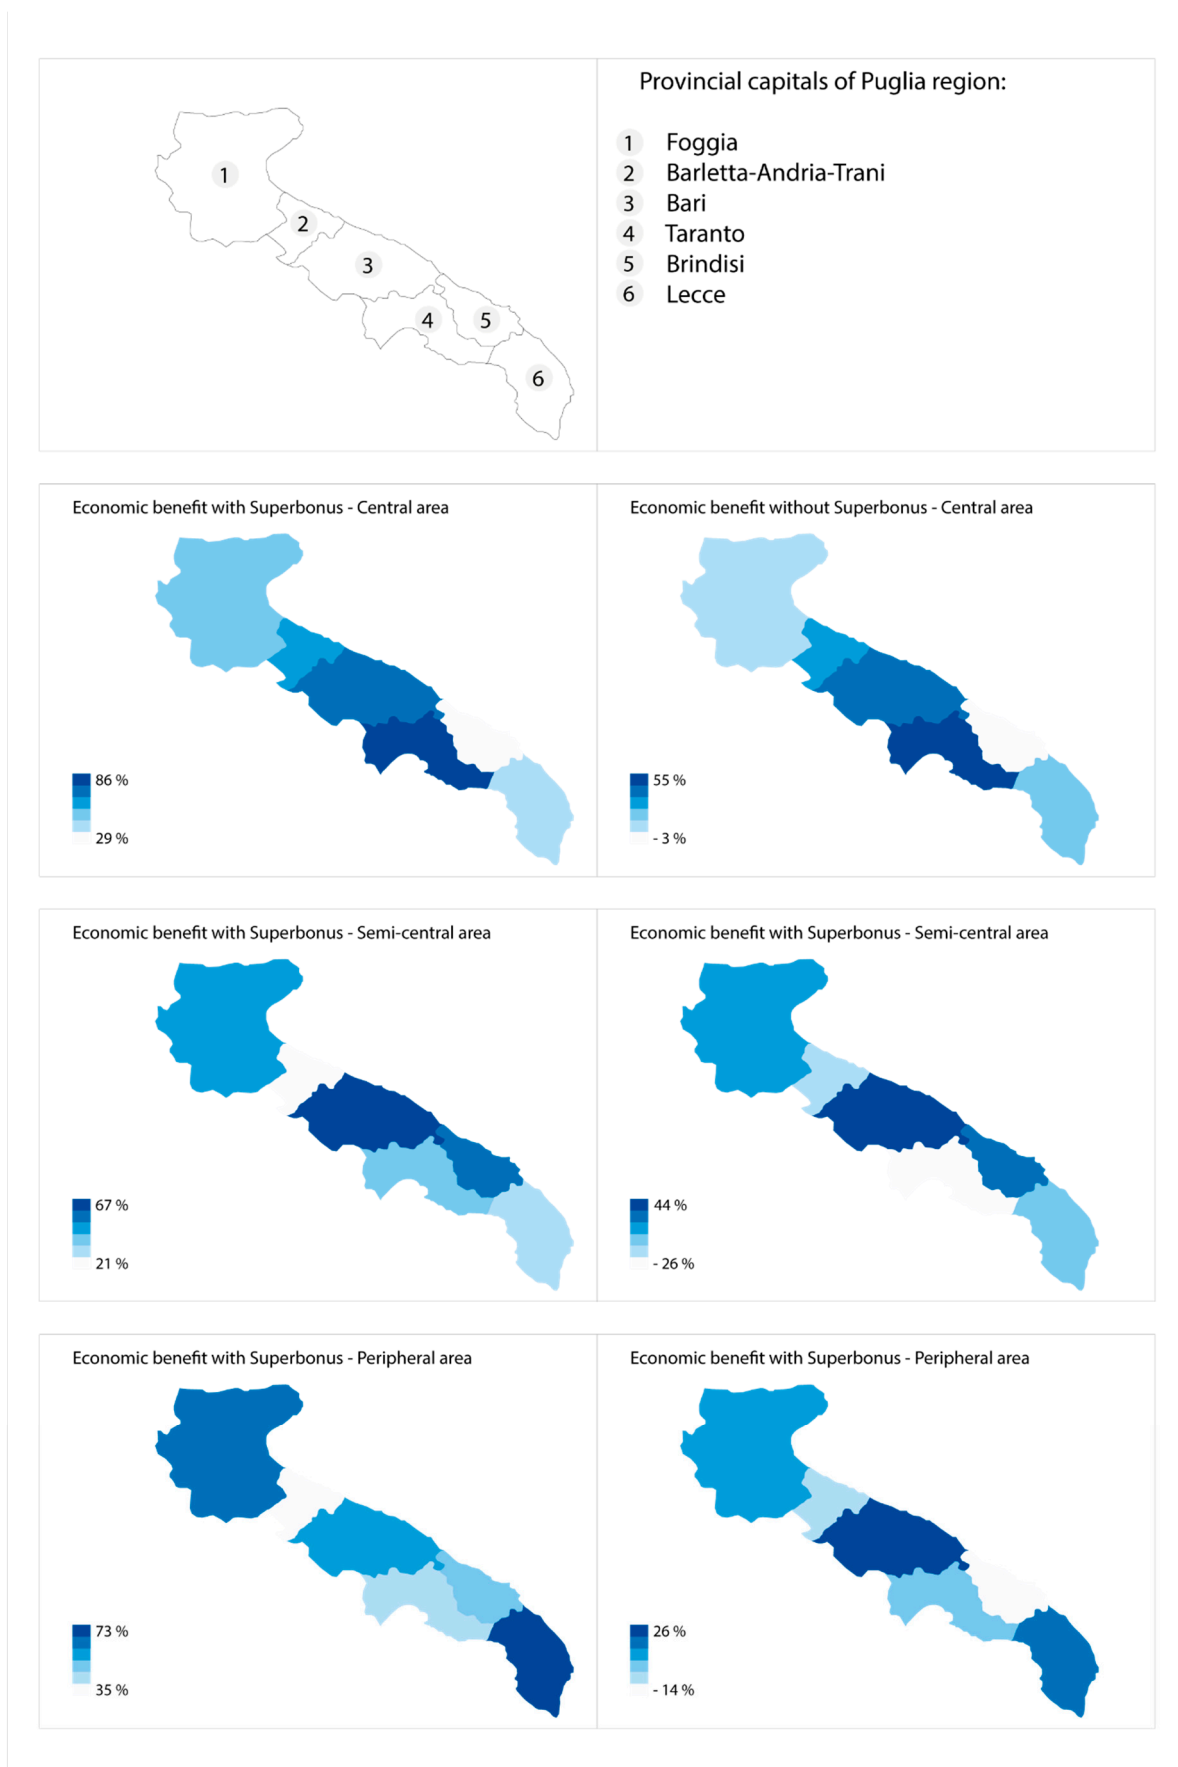

**Figure S16.** Convenience maps defined for the urban areas of the provincial capitals located in Puglia region

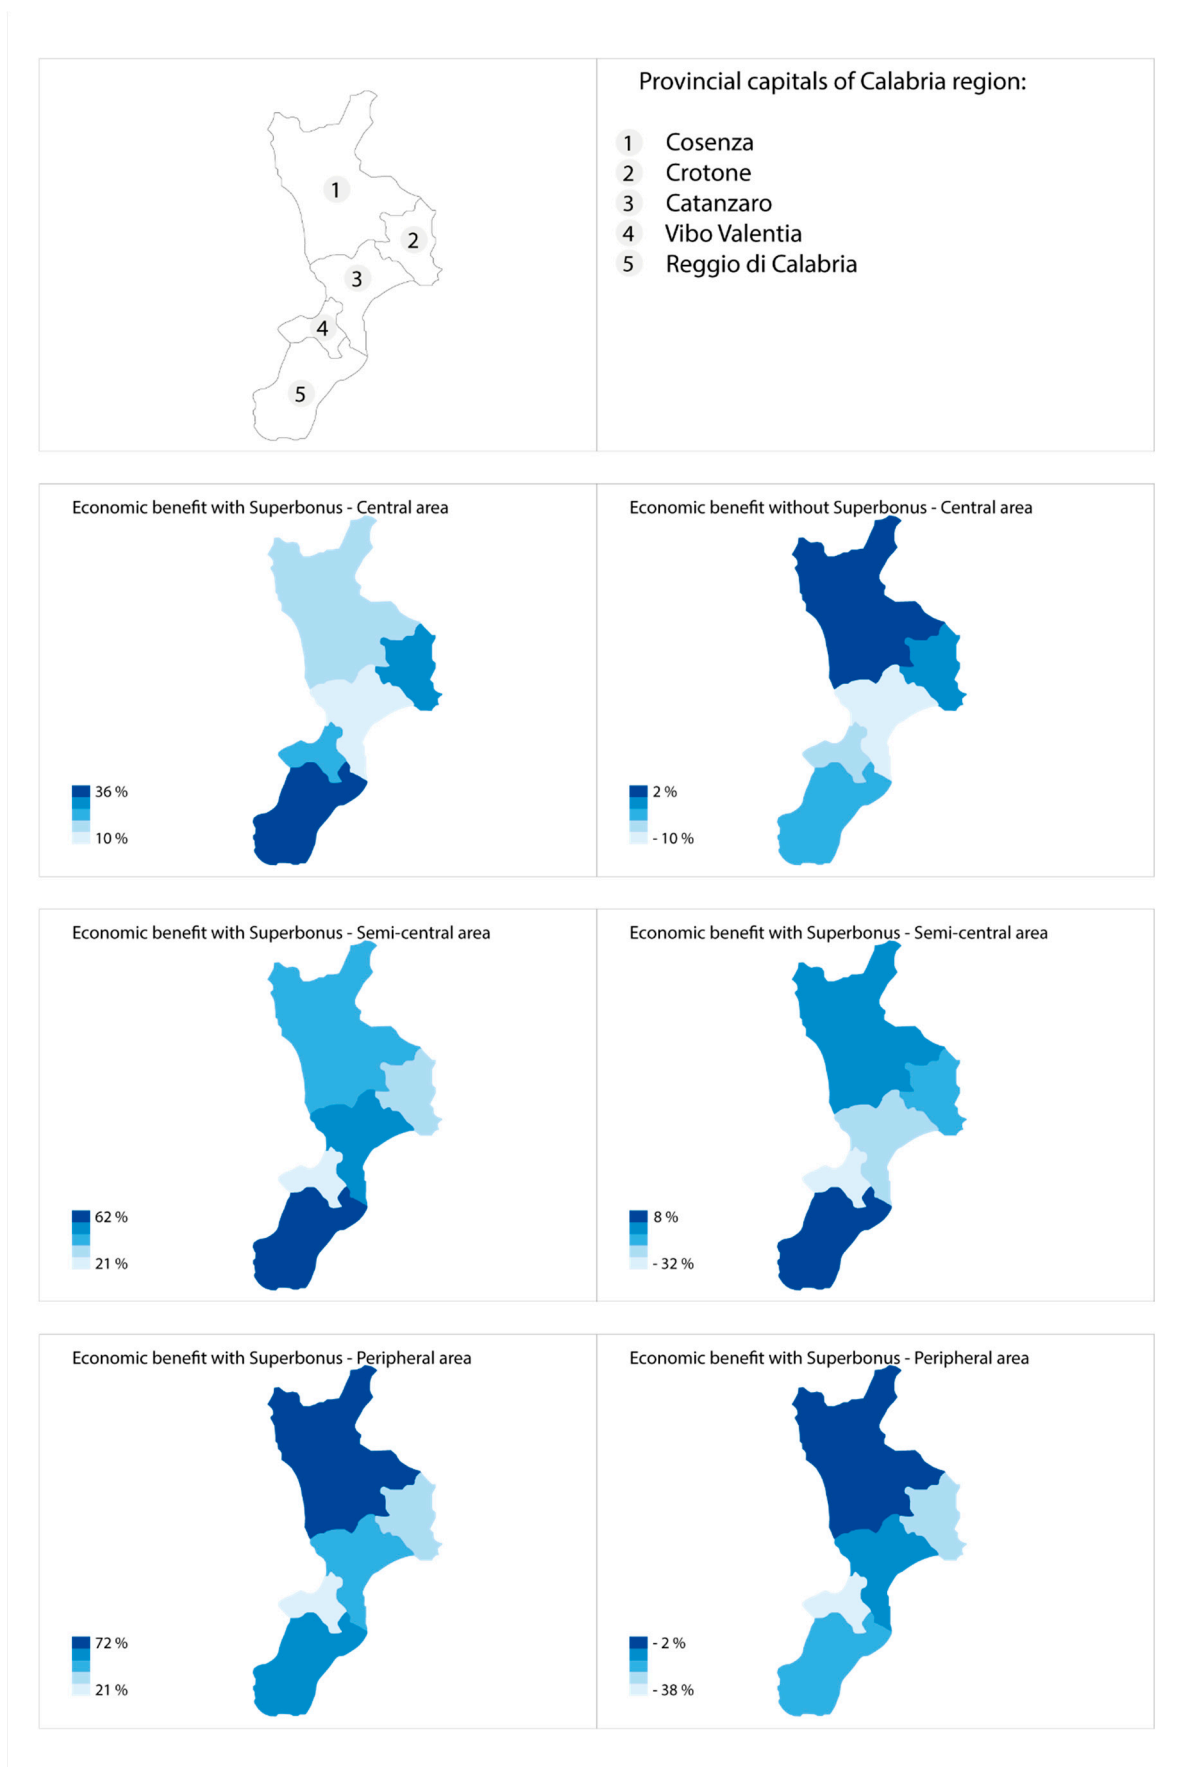

**Figure S17.** Convenience maps defined for the urban areas of the provincial capitals located in Calabria region

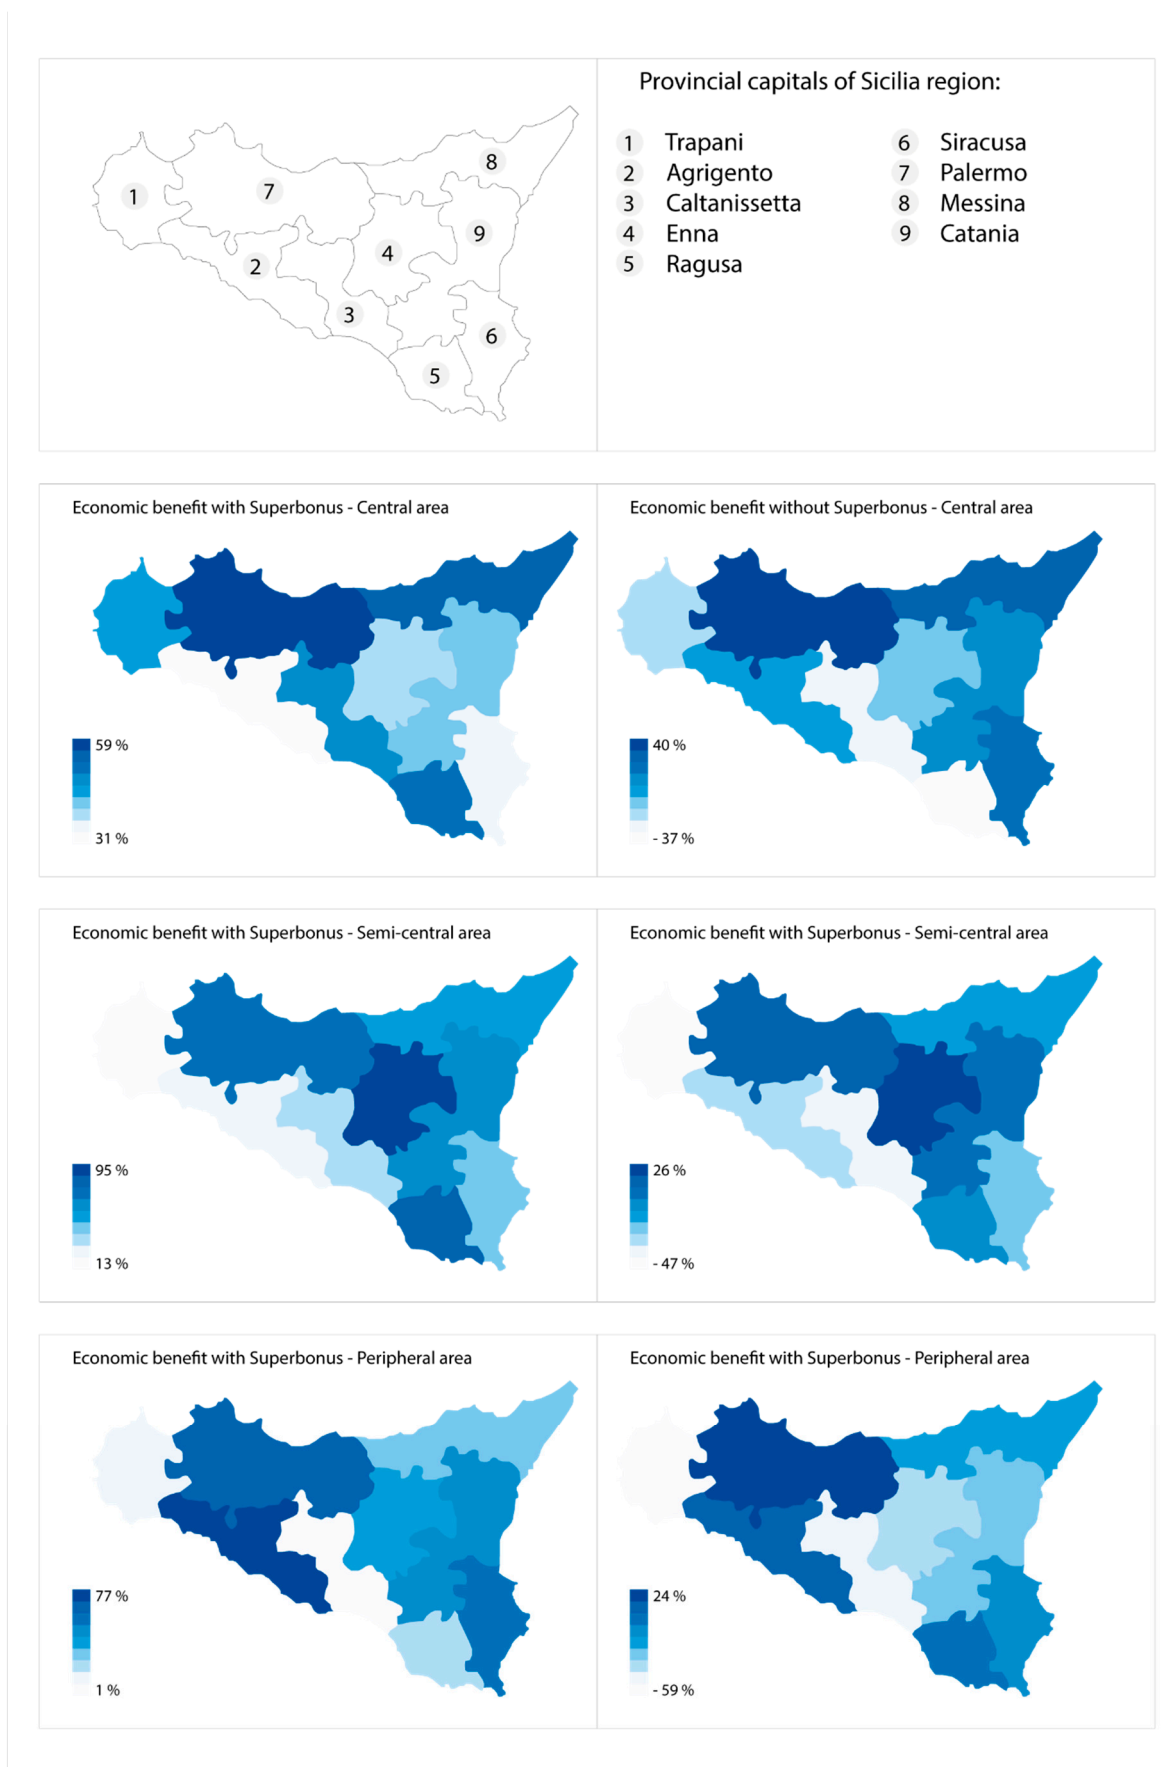

**Figure S18.** Convenience maps defined for the urban areas of the provincial capitals located in Sicilia region

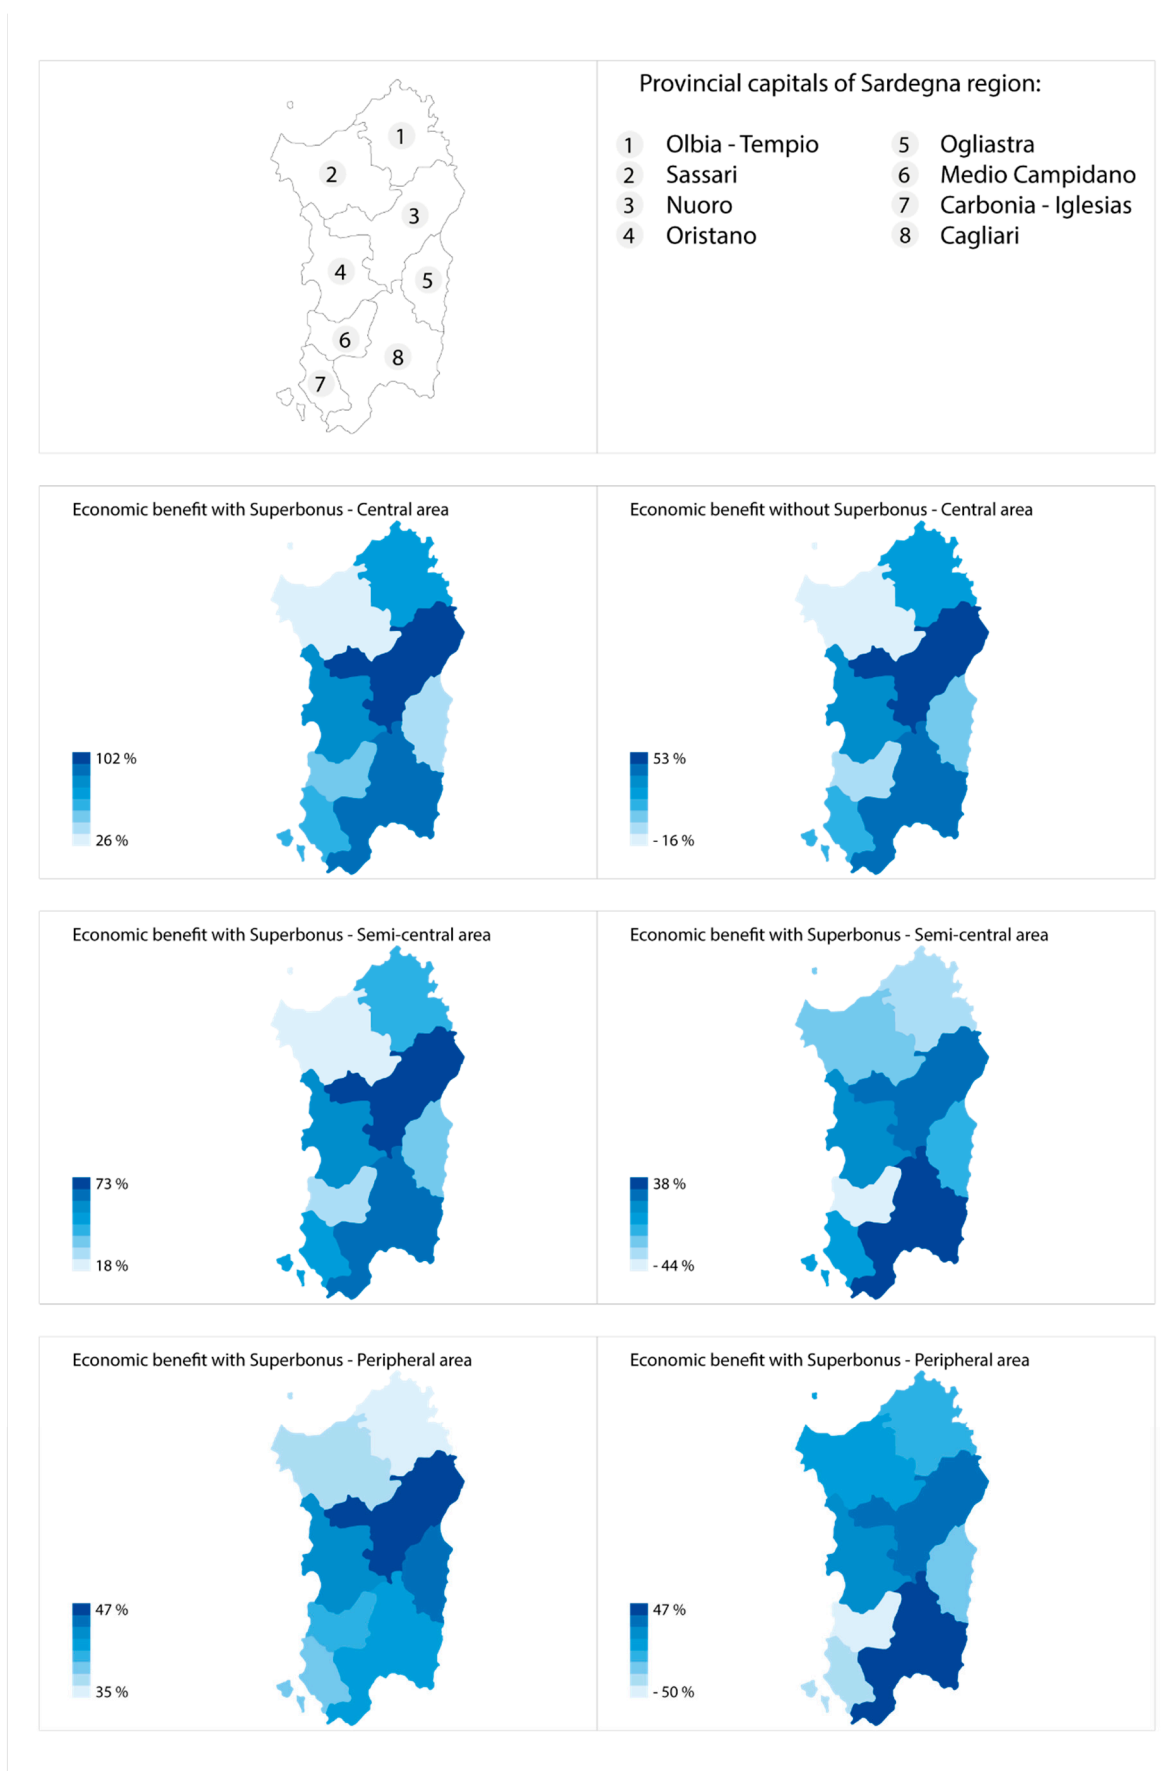

**Figure S19.** Convenience maps defined for the urban areas of the provincial capitals located in Sardegna region



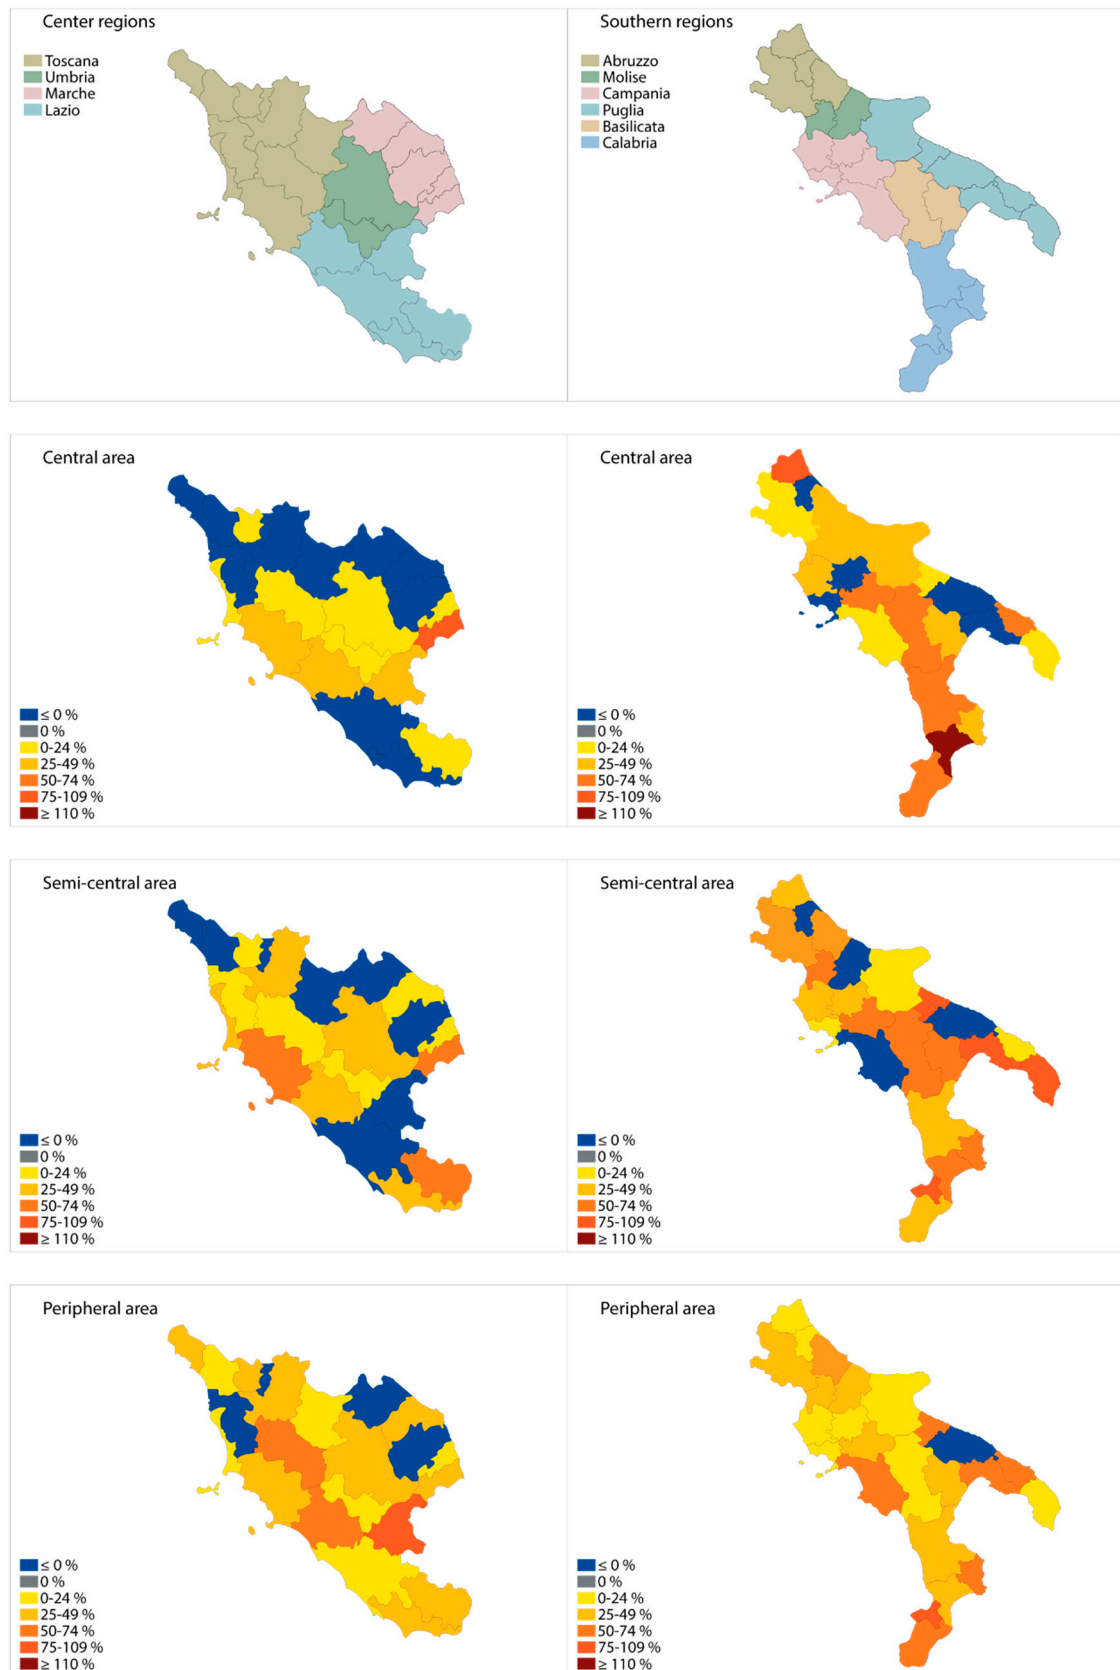

**Figure S20.** Isoprofit maps developed for the Central Italy and Southern Italy macro-areas

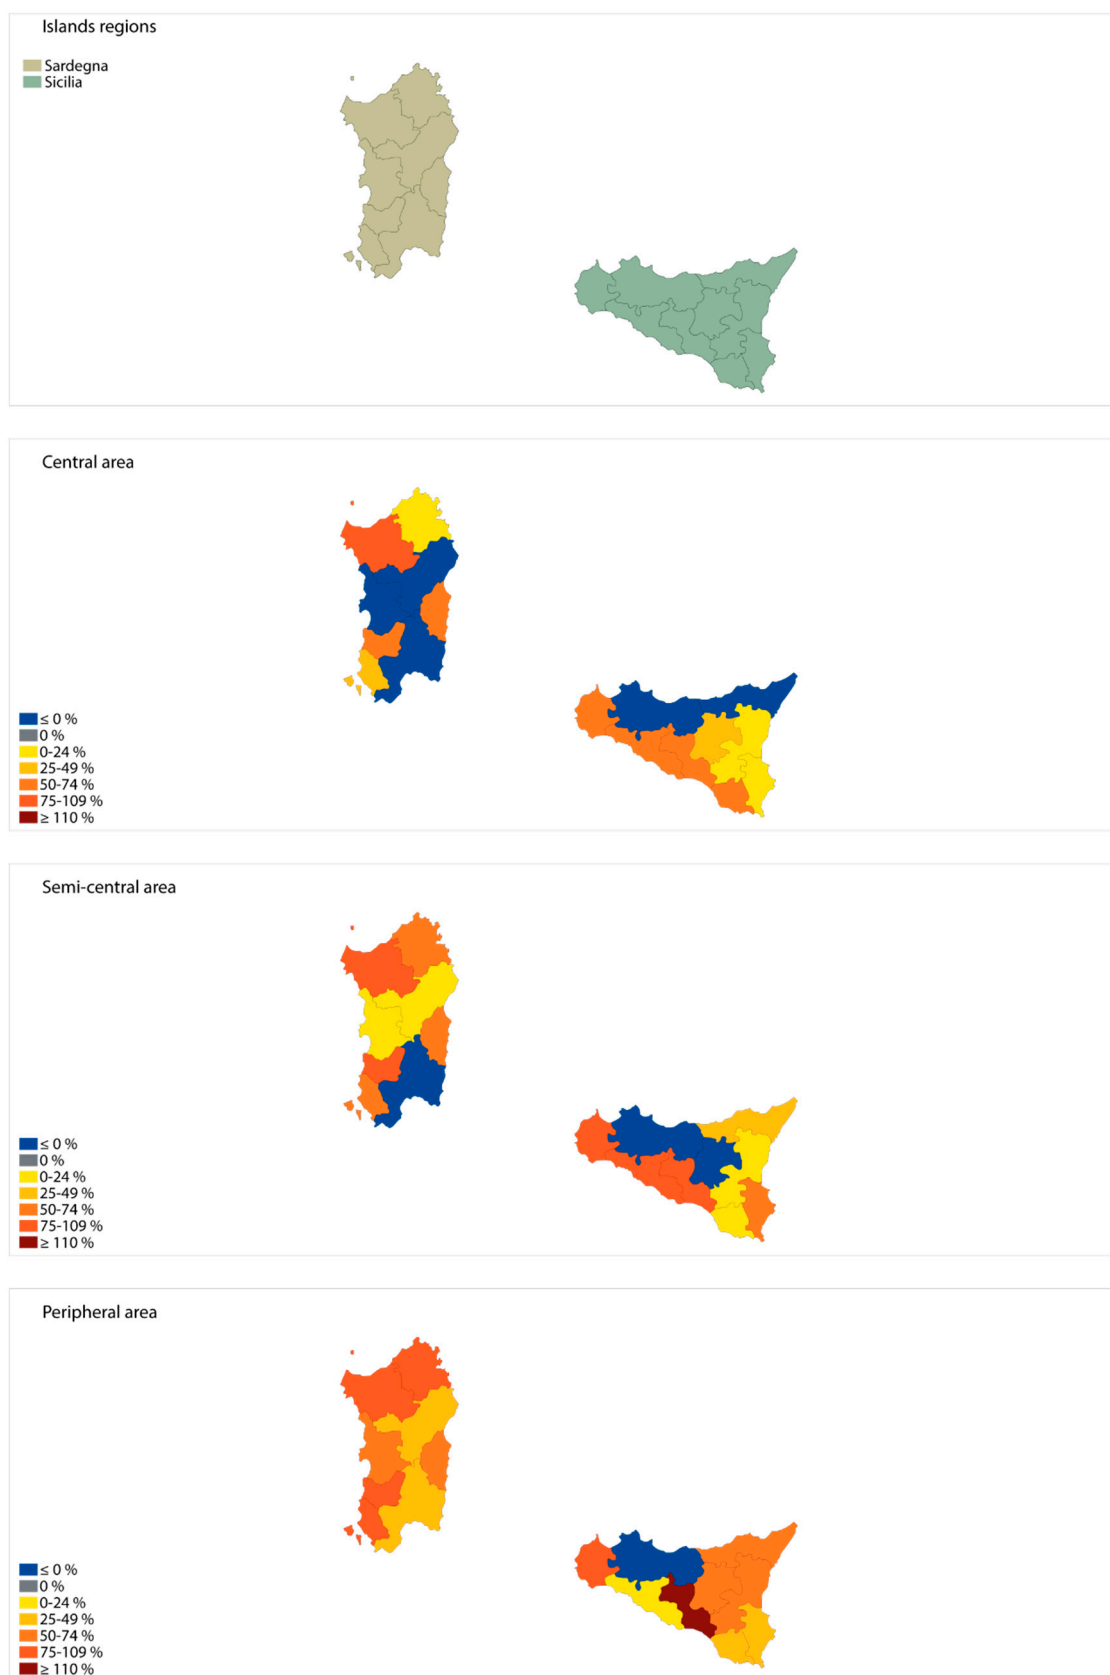

Figure S21. Isoprofit maps developed for the Italian Islands

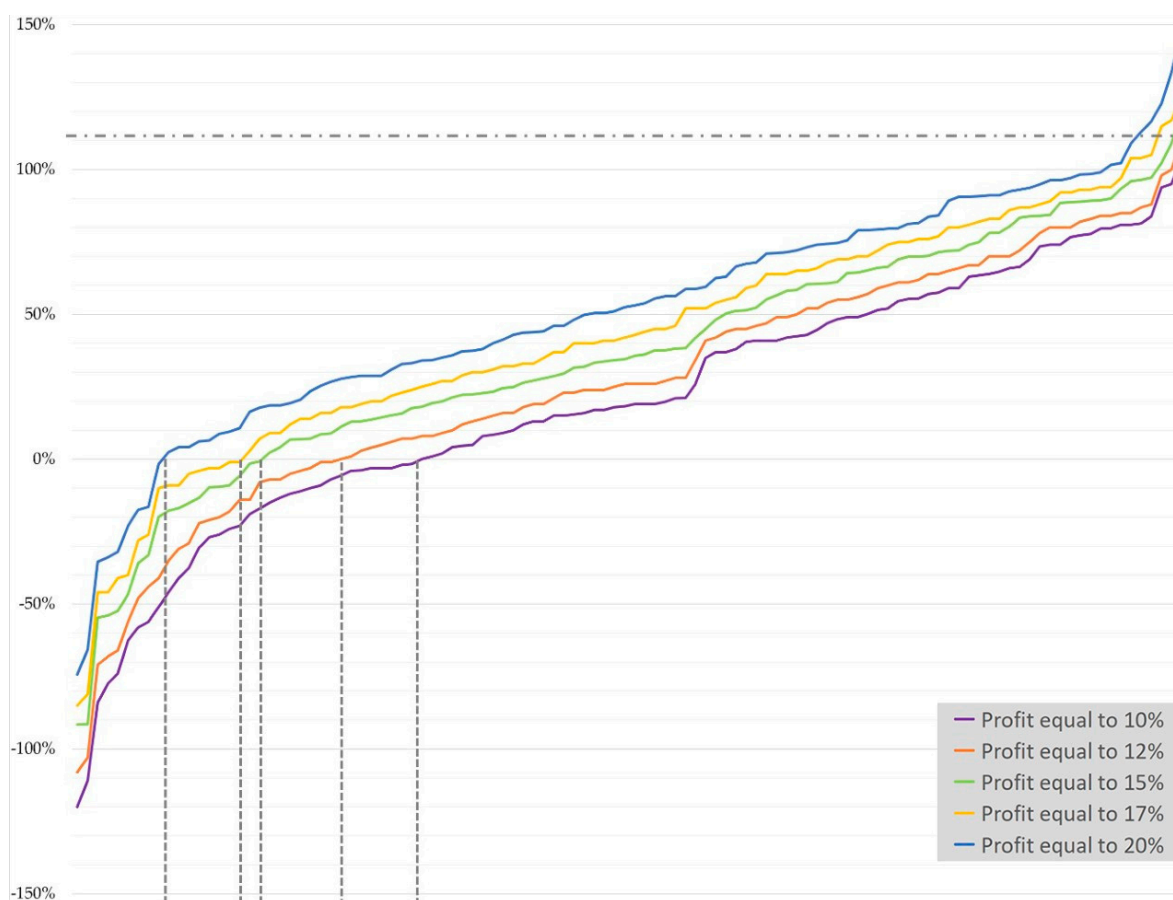

**Figure S22.** Sensitivity analysis obtained in correspondence of five percentage profit margins considered [10%, 12%, 15%, 17% and 20%] for the semi-central area of the Italian provincial capitals considered

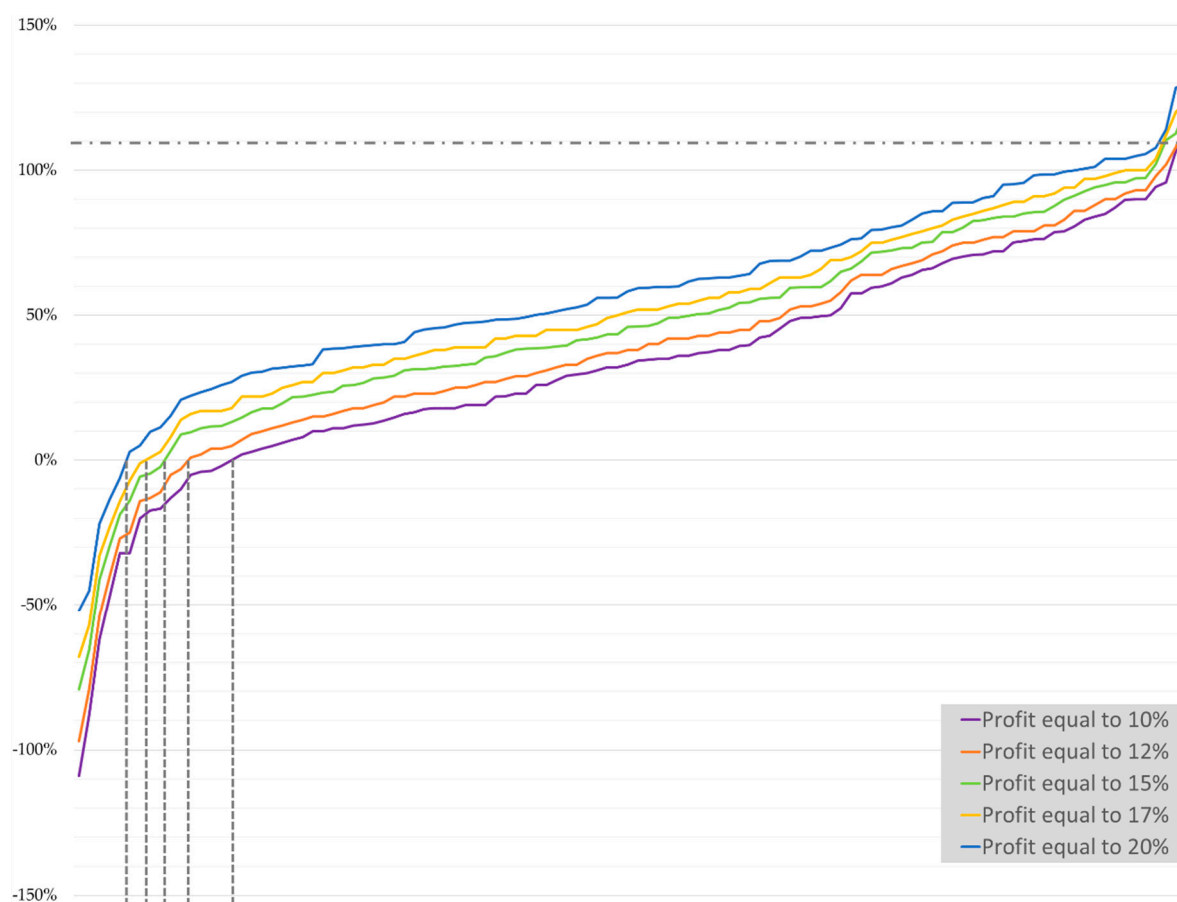

**Figure S23.** Sensitivity analysis obtained in correspondence of five percentage profit margins considered [10%, 12%, 15%, 17% and 20%] for the peripheral area of the Italian provincial capitals considered
